# Supplementary material
Source: PubMed Central journal article supplement (PMC7592033)
Supplement: jama-e2016167-s001.pdf [file jama-e2016167-s001.pdf]

## Supplemental Online Content

You SC, Rho Y, Bikdeli B, et al. Association of ticagrelor vs clopidogrel with net adverse clinical events in patients with acute coronary syndrome undergoing percutaneous coronary intervention. *JAMA*. doi: 10.1001/jama.2020.16167

|                                                                                                                                                                                                                                                                                                                                                                                 |    |
|---------------------------------------------------------------------------------------------------------------------------------------------------------------------------------------------------------------------------------------------------------------------------------------------------------------------------------------------------------------------------------|----|
| eMethod 1. Data source .....                                                                                                                                                                                                                                                                                                                                                    | 3  |
| eMethod 2. Cohort definitions .....                                                                                                                                                                                                                                                                                                                                             | 4  |
| eMethod 3. Individual outcome definitions .....                                                                                                                                                                                                                                                                                                                                 | 6  |
| eMethod 4. Weighted incidence of net adverse clinical event .....                                                                                                                                                                                                                                                                                                               | 8  |
| eMethod 5. Falsification endpoints.....                                                                                                                                                                                                                                                                                                                                         | 9  |
| eTable 1. Baseline characteristics of the Optum EHR database .....                                                                                                                                                                                                                                                                                                              | 11 |
| eTable 2. Baseline characteristics of the IQVIA-Hospital database .....                                                                                                                                                                                                                                                                                                         | 15 |
| eTable 3. Baseline characteristics of the HIRA database .....                                                                                                                                                                                                                                                                                                                   | 18 |
| eTable 4. Patient cohort sizes, primary endpoint events, incidence rates, and minimum detectable relative risk                                                                                                                                                                                                                                                                  | 21 |
| eTable 5. Drug adherence after the index date in the HIRA database .....                                                                                                                                                                                                                                                                                                        | 22 |
| eTable 6. Incidence rate difference using random-effects meta-analysis .....                                                                                                                                                                                                                                                                                                    | 23 |
| eTable 7. Incidence rates of secondary endpoint events at one year in the ticagrelor groups from this study and TICA-KOREA.....                                                                                                                                                                                                                                                 | 24 |
| eFigure 1. Proportion of ticagrelor group among the whole study population, 2011-2019 .....                                                                                                                                                                                                                                                                                     | 25 |
| eFigure 2. Covariate balance plot before and after propensity score matching .....                                                                                                                                                                                                                                                                                              | 26 |
| eFigure 3. Systematic error control of effect estimation in the meta-analysis comparing the risk of net adverse clinical event between the ticagrelor and clopidogrel group under one-year, 1-to-1 propensity score matching design.....                                                                                                                                        | 27 |
| eFigure 4. Sensitivity analyses for risks of the primary outcome (NACE) associated with ticagrelor and clopidogrel use, analyzed using a meta-analysis and various time-at-risk, statistical, and clinical definition settings.....                                                                                                                                             | 28 |
| eFigure 5. Risks of NACE associated with ticagrelor and clopidogrel use, analyzed using a meta-analysis and various time-at-risk, statistical, and clinical definition settings after empirical calibration.....                                                                                                                                                                | 30 |
| eFigure 6. Risks of NACE associated with ticagrelor and clopidogrel use, analyzed using a meta-analysis and various time-at-risk, statistical, and clinical definition settings from 2013 to 2015 .....                                                                                                                                                                         | 31 |
| eFigure 7. Distribution of risk estimates for NACE from 144 analyses before and after empirical calibration ...                                                                                                                                                                                                                                                                 | 32 |
| eFigure 8. Meta-analysis results using only US databases .....                                                                                                                                                                                                                                                                                                                  | 33 |
| eFigure 9. Sensitivity analyses for risks of ischemic event (recurrent acute myocardial infarction, revascularization, or ischemic stroke) and hemorrhagic event (hemorrhagic stroke or gastrointestinal bleeding) associated with ticagrelor and clopidogrel use, analyzed using a meta-analysis and various time-at-risk, statistical, and clinical definition settings ..... | 35 |
| eFigure 10. Risks of ischemic stroke associated with ticagrelor and clopidogrel use, analyzed using a meta-analysis and various time-at-risk, statistical, and clinical definition settings .....                                                                                                                                                                               | 36 |

|                                                                                                                                                                                                                         |    |
|-------------------------------------------------------------------------------------------------------------------------------------------------------------------------------------------------------------------------|----|
| eFigure 11. Risks of recurrent acute myocardial infarction associated with ticagrelor and clopidogrel use, analyzed using a meta-analysis and various time-at-risk, statistical, and clinical definition settings ..... | 37 |
| eFigure 12. Risks of revascularization associated with ticagrelor and clopidogrel use, analyzed using a meta-analysis and various time-at-risk, statistical, and clinical definition settings .....                     | 38 |
| eFigure 13. Risks of hemorrhagic stroke associated with ticagrelor and clopidogrel use, analyzed using a meta-analysis and various time-at-risk, statistical, and clinical definition settings .....                    | 39 |
| eFigure 14. Risks of GI bleeding associated with ticagrelor and clopidogrel use, analyzed using a meta-analysis and various time-at-risk, statistical, and clinical definition settings .....                           | 40 |
| eFigure 15. Risks of all-cause mortality associated with ticagrelor and clopidogrel use, analyzed using a meta-analysis and various time-at-risk, statistical, and clinical definition settings .....                   | 41 |
| eFigure 16. Risks of cardiovascular-related mortality associated with ticagrelor and clopidogrel use, analyzed using a meta-analysis and various time-at-risk, statistical, and clinical definition settings .....      | 42 |
| eFigure 17. Risks of major adverse cardiovascular event associated with ticagrelor and clopidogrel use, analyzed using a meta-analysis and various time-at-risk, statistical, and clinical definition settings .....    | 43 |

This supplemental material has been provided by the authors to give readers additional information about their work.

## **eMethod 1. Data source**

### **Optum® de-identified Electronic Health Record dataset**

Optum electronic health record (EHR) is an aggregated and de-identified electronic health record repository from US health systems. The medical record data includes clinical information, inclusive of prescriptions as prescribed and administered, lab results, vital signs, body measurements, diagnoses, procedures, and information derived from clinical notes using natural language processing (NLP). The data from November 20, 2011 to March 3, 2019 were used for this study. New England Institutional Review Board (IRB) and was determined to be exempt from broad IRB approval, as this research project did not involve human subject research.

### **IQVIA-Hospital Charge Data Master**

Anonymized patient level data are sourced from hospital charge data masters and collected from resource management software within short-term, acute-care and non-federal hospitals in the United States. Data covers over 86 million patients, 122,000 providers, 230 specialties and more than 530 million unique visits from 2007 to 2018. The data from November 14, 2011 to June 29, 2018 were used for this study. A retrospective database study on this de-identified data is deemed not human subject research. Approval is provided for OHDSI community studies.

### **HIRA**

HIRA claims data include healthcare utilization information of the entire population of South Korea, consisting of diagnosis, procedure, drug, medical material, healthcare resource, etc. The current study is conducted based on the converted CDM data<sup>1</sup> of the patients who received PCIs between 2007 and 2016. The CDM data include 462,486 patients with more than 155 million claims information. The data from February 28, 2013 to December 31, 2016 were used for this study. The present study was approved by the Scientific and Ethical Advisory Board of the HIRA (Project number: 2017-034-002)

## eMethod 2. Cohort definitions

OHDSI's ATALS is an open source software tool (<http://www.ohdsi.org/web/atlas/#/home>) for researchers to conduct scientific analyses on standardized observational data converted to the OMOP Common Data model v5. Researchers can create cohorts by defining groups of people based on an exposure to a drug or diagnosis of a particular condition using healthcare data.

**Supplementary Figure.** Graphical overview of the cohorts and study design

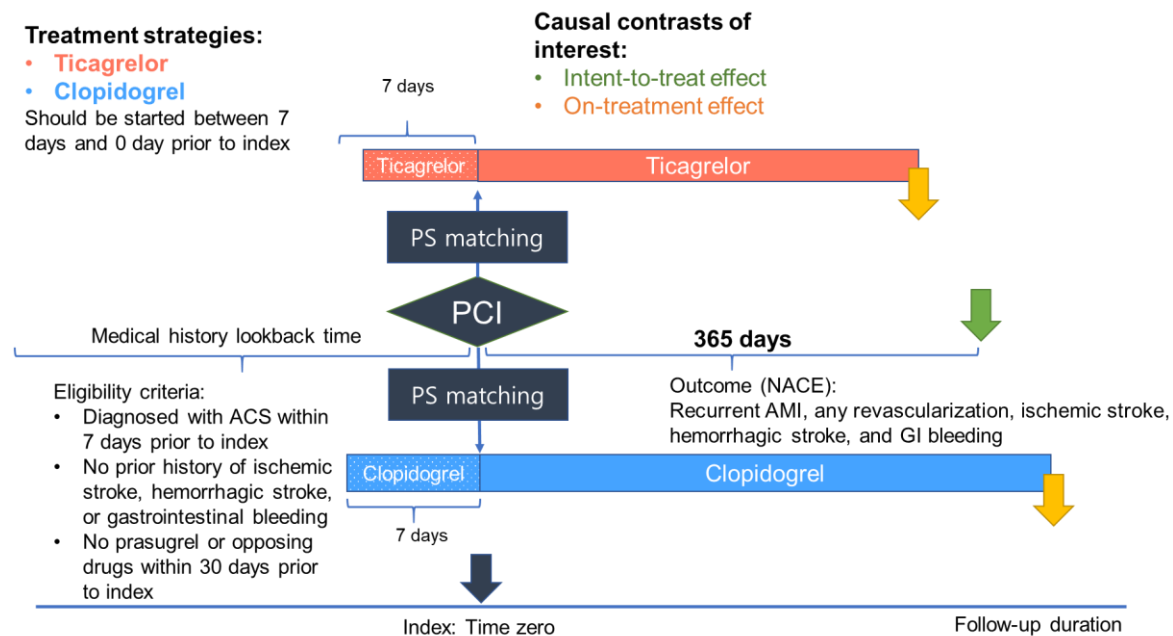

Abbreviation: ACS, acute coronary syndrome; AMI, acute myocardial infarction; GI, gastrointestinal; NACE, net adverse clinical event; PCI, percutaneous coronary intervention; PS, propensity score.

### Ticagrelor cohort

We define a cohort of ticagrelor user in the following way.

Index rule defining the patient index date:

- A procedure of percutaneous coronary intervention for the first time in the person's history with age  $\geq 20$ .

Inclusion rule based on the index date:

- At least 365 days of observation time prior to the index date
- A diagnosis of acute coronary syndrome within 7 days prior to the index date
- Initiation of ticagrelor within 7 days prior to the index date

Exclusion rule based on the index date:

- Drug exposure of clopidogrel or prasugrel within 30 days prior to the index date
- Previous history of ischemic or hemorrhagic stroke
- Previous history of gastrointestinal bleeding

Censoring rule

- The cohort was censored when the patient stopped to continue ticagrelor more than 7 days

A parameterized SQL translation for cohort generation in any OMOP CDM v5 databases is available in: [https://github.com/ohdsi-studies/TicagrelorVsClopidogrel/blob/master/inst/sql/sql\\_server/Ticagrelor.sql](https://github.com/ohdsi-studies/TicagrelorVsClopidogrel/blob/master/inst/sql/sql_server/Ticagrelor.sql).

### Clopidogrel cohort

We define a cohort of clopidogrel user in the following way.

Index rule defining the patient index date:

- A procedure of percutaneous coronary intervention for the first time in the person's history with age  $\geq 20$ .

Inclusion rule based on the index date:

- At least 365 days of observation time prior to the index date
- A diagnosis of acute coronary syndrome within 7 days prior to the index date
- Initiation of clopidogrel within 7 days prior to the index date

Exclusion rule based on the index date:

- Drug exposure of ticagrelor or prasugrel within 30 days prior to the index date
- Previous history of ischemic or hemorrhagic stroke
- Previous history of gastrointestinal bleeding

Censoring rule

- The cohort was censored when the patient stopped to continue clopidogrel more than 7 days

A parameterized SQL translation for cohort generation in any OMOP CDM v5 databases is available in:  
[https://github.com/ohdsi-studies/TicagrelorVsClopidogrel/blob/master/inst/sql/sql\\_server/Clopidogrel.sql](https://github.com/ohdsi-studies/TicagrelorVsClopidogrel/blob/master/inst/sql/sql_server/Clopidogrel.sql).

### eMethod 3. Individual outcome definitions

For each outcome, we developed an operational phenotype definition to determine if observational data could in fact support evaluation of the outcome. Where possible, concept sets originated with published code lists (eg ICD-9-CM and ICD-10). We developed definition of outcome cohorts and query to extract them using ATLAS, the OHDSI open-source platform (<https://github.com/OHDSI/atlas>). We executed these definitions on EHR data of Korean tertiary hospital to validate the definitions. Positive predictive values were estimated by a physician’s manual chart review of discharge notes.

**Supplementary Table.** Outcome definition

| Outcome                     | Logical description                                                   | ICD-9-CM                                                                                                                                                                          | ICD-10                                                                                        | CPT4                                                                                                                                                                                                                                                                    | PPV, % (n)    |
|-----------------------------|-----------------------------------------------------------------------|-----------------------------------------------------------------------------------------------------------------------------------------------------------------------------------|-----------------------------------------------------------------------------------------------|-------------------------------------------------------------------------------------------------------------------------------------------------------------------------------------------------------------------------------------------------------------------------|---------------|
| Acute myocardial infarction | Record of acute myocardial infarction during an inpatient or ER visit | 410;410.01;410.02;410.1;410.11;410.12;410.2;410.21;410.22;410.3;410.31;410.32;410.4;410.41;410.42;410.5;410.51;410.52;410.7;410.71;410.72;410.8;410.81;410.82;410.9;410.91;410.92 | I21.0;I21.1;I21.2;I21.3;I21.4;I21.9                                                           |                                                                                                                                                                                                                                                                         | 83.8 (83/99)  |
| Revascularization           | Record of PCI or CABG during an inpatient or ER visit                 |                                                                                                                                                                                   |                                                                                               | 566;567;33510;33511;33512;33513;33514;33516;33517;33518;33519;33521;33522;33523;33533;33534;33535;33536;33542;33545;33548;33572;33621;35506;35694;92920;92921;92924;92925;92928;92929;92933;92934;92937;92938;92941;92943;92944;1006199;1006200;1006208;1006216;1006217 | 100.0 (30/30) |
| Ischemic stroke             | Earliest record of ischemic stroke during an inpatient or ER visit    | 346.6;346.61;346.62;346.63;433.01;433.11;433.21;433.31;433.81;433.91;434.01;434.11;434.91;997.02                                                                                  | I63.9;I63.8;I63.6;I63.5;I63.4;I63.3;I63.2;I63.1;I63.0;I63.G46.7;G46.6;G46.5;F01.3;F01.1;F01.0 |                                                                                                                                                                                                                                                                         | 72.9 (70/96)  |

**Supplementary Table. Outcome definition (continued)**

|                           |                                                                                                                |                                                                                                                                                                                                                                                                                                                                                                                                                                                        |                                                                                                                               |  |               |
|---------------------------|----------------------------------------------------------------------------------------------------------------|--------------------------------------------------------------------------------------------------------------------------------------------------------------------------------------------------------------------------------------------------------------------------------------------------------------------------------------------------------------------------------------------------------------------------------------------------------|-------------------------------------------------------------------------------------------------------------------------------|--|---------------|
| Hemorrhagic stroke        | Earliest record of intracranial hemorrhage without concomitant ischemic stroke during an inpatient or ER visit | 430;431;432;432.1;432.9                                                                                                                                                                                                                                                                                                                                                                                                                                | I60;I60.0;I60.5;I60.6;I60.7;I60.8;I60.9;I61.0;I61.1;I61.2;I61.3;I61.4;I61.5;I62;I62.0;I62.1;I62.9                             |  | 100.0 (46/46) |
| Gastrointestinal bleeding | Gastrointestinal hemorrhage condition record during an inpatient or ER visit                                   | 530.21;530.7;530.82;531;531;531.01;531.2;531.2;531.21;531.4;531.4;531.41;531.6;531.6;531.61;532;532;532.01;532.2;532.2;532.21;532.4;532.4;532.41;532.6;532.6;532.61;533;533;533.01;533.2;533.2;533.21;533.4;533.4;533.41;533.6;533.6;533.61;534;534;534.01;534.2;534.2;534.21;534.4;534.4;534.41;534.6;534.6;534.61;535.01;535.11;535.21;535.31;535.41;535.51;535.61;535.71;537.83;537.84;562.02;562.03;562.12;562.13;569.3;569.85;578;578;578.1;578.9 | K22.6;K25.0;K25.2;K25.4;K25.6;K26.0;K26.2;K26.4;K26.6;K27.0;K27.2;K27.4;K27.6;K28.0;K28.2;K28.4;K28.6;K62.5;K92.0;K92.1;K92.2 |  | 95.8 (68/71)  |
| Dyspnea                   | Record of dyspnea                                                                                              | 786.02;786.05                                                                                                                                                                                                                                                                                                                                                                                                                                          | R06.0                                                                                                                         |  | 94.7 (18/19)  |
| All-cause mortality       | Death record of any type                                                                                       |                                                                                                                                                                                                                                                                                                                                                                                                                                                        |                                                                                                                               |  |               |

PPV was represented as % (number of true positive cases / number of examined cases).

Abbreviation: PPV, positive predictive value; ER, emergency room

## Method 4. Weighted incidence of net adverse clinical event

Similar to the paper of Eikelboom et al.<sup>3</sup>, we estimated the weighted incidence of net adverse clinical event using following formula:

$$\begin{aligned} \text{net adverse clinical event} \\ = [Incidence\ rate(IR)_{\text{ischemic stroke}} + w1IR_{\text{acute myocardial infarction}} \\ + w2IR_{\text{revascularization}} + w3IR_{\text{GI bleeding}} + w4IR_{\text{hemorrhagic stroke}}] \end{aligned}$$

Weights for each event represent the ratio of the adjusted hazard ratios of that event for 1-year mortality, using the hazard ratio for ischemic stroke as a reference. We used Korean National Health Insurance Service-National Sample Cohort<sup>1,4</sup> to calculate estimated the weights for each outcome (ischemic stroke, acute myocardial infarction, revascularization, gastrointestinal bleeding, and hemorrhagic stroke), since this database has complete record of mortality of randomly sampled 2% of Korean general population from 2002 to 2013. Until 2013, ticagrelor was not approved to use in Korea. Hazard ratios for 1-year mortality between patients with the outcome versus without outcome are estimated in the cohort with identical inclusion criteria with clopidogrel group of the study.

The estimate of weighted net adverse clinical event was higher in ticagrelor group than clopidogrel (461.82 per 1000 person-year in ticagrelor vs 374.0 per 1000 person-year in clopidogrel; absolute rate difference = 87.8 per 1000 person-year). We did not perform the statistical analysis to identify the significance.

**Supplementary Table.** Hazards ratios for death and weights for ischemic and bleeding events in the clopidogrel group

|                             | Clopidogrel group in NHIS-NSC (n=3 205) |                    |       |         |
|-----------------------------|-----------------------------------------|--------------------|-------|---------|
|                             | Events/Deaths                           | HR (95% CI)        | P     | Weight* |
| Ischemic stroke             | 55/6                                    | 2.50 (0.92-5.73)   | .05   | 1       |
| Acute myocardial infarction | 386/37                                  | 3.31 (2.16-4.98)   | <.001 | 1.32    |
| Revascularization           | 247/4                                   | 0.42 (0.13-1.03)   | .10   | 0.17    |
| Gastrointestinal bleeding   | 51/11                                   | 6.27 (2.88-12.70)  | <.001 | 2.51    |
| Hemorrhagic stroke          | 12/6                                    | 25.94 (7.44-89.89) | <.001 | 10.37   |

\*Weights (w1, w2, w3, and w4) are the ratio of the HR using for ischemic stroke as a reference.

Weighted incidence of Net Adverse Clinical Event in Ticagrelor group per 1000 person\*year =  
 7.5(ischemic stroke) + 81.1 \* 1.32 (Acute MI) + 42.7 \* 0.17 (Revascularization) + 19.0 \* 6.27 (gastrointestinal bleeding) + 21.3 \* 10.37 (Hemorrhagic stroke)  
 = 461.82 / 1000 PY

Weighted incidence of Net Adverse Clinical Event in Clopidogrel group per 1000 person\*year =  
 8.1 (ischemic stroke) + 81.8 \* 1.32 (Acute MI) + 43.0 \* 0.17 (Revascularization) + 14.1 \* 6.27 (gastrointestinal bleeding) + 15.7 \* 10.37 (Hemorrhagic stroke)  
 = 373.98 / 1000 PY



## eMethod 5. Falsification endpoints

Falsification endpoints (negative control outcomes) are concepts known to not be associated with the target or comparator cohorts, such that we can assume the true relative risk between the two cohorts is 1. Total of 96 falsification endpoints are selected using a similar process to that outlined by Voss et al.<sup>2</sup> The concept IDs and SNOMED codes are described below.

**Supplementary Table.** Falsification endpoint list

| OMOP Concept ID | SNOMED code | Outcome Name                    |
|-----------------|-------------|---------------------------------|
| 378256          | 46670006    | Abnormal reflex                 |
| 4218106         | 7200002     | Alcoholism                      |
| 440424          | 87486003    | Aphasia                         |
| 439237          | 52684005    | Assault                         |
| 378424          | 82649003    | Astigmatism                     |
| 261880          | 46621007    | Atelectasis                     |
| 134118          | 400190005   | Atrophic condition of skin      |
| 4224118         | 40492006    | Bladder dysfunction             |
| 80509           | 203465002   | Bone cyst                       |
| 434626          | 20010003    | Borderline personality disorder |
| 438407          | 78004001    | Bulimia nervosa                 |
| 134765          | 238108007   | Cachexia                        |
| 4172458         | 49883006    | Candidiasis of skin             |
| 436740          | 17382005    | Cervical incompetence           |
| 381581          | 1482004     | Chalazion                       |
| 4307254         | 423125000   | Closed fracture                 |
| 4047787         | 123971006   | Colles' fracture                |
| 198075          | 240542006   | Condyloma acuminatum            |
| 73302           | 64217002    | Curvature of spine              |
| 4242416         | 58588007    | Cutis laxa                      |
| 433163          | 238107002   | Deficiency of macronutrients    |
| 4047269         | 229844004   | Deformity of foot               |
| 133228          | 80967001    | Dental caries                   |
| 4095288         | 26298008    | Diabetic coma with ketoacidosis |
| 4044391         | 230572002   | Diabetic neuropathy             |
| 443767          | 25093002    | Diabetic oculopathy             |
| 4147672         | 30415006    | Disease due to Papilloma virus  |
| 4140510         | 3305006     | Disorder of lymphatic vessel    |
| 433440          | 78667006    | Dysthymia                       |
| 376132          | 62909004    | Ectropion                       |
| 440695          | 302690004   | Encopresis                      |
| 438872          | 267023007   | Excessive eating - polyphagia   |
| 78804           | 27431007    | Fibrocystic disease of breast   |
| 4131595         | 12676007    | Fracture of radius              |
| 74855           | 33839006    | Genital herpes simplex          |
| 441788          | 240532009   | Human papilloma virus infection |
| 76737           | 55434001    | Hydrocele                       |
| 4029582         | 237793004   | Hyperandrogenization syndrome   |
| 195212          | 47270006    | Hypercortisolism                |
| 438134          | 77692006    | Hypersomnia                     |
| 45768449        | 706882009   | Hypertensive crisis             |
| 140362          | 36976004    | Hypoparathyroidism              |
| 4322737         | 427898007   | Infection of tooth              |
| 4207688         | 55184003    | Infectious enteritis            |
| 79072           | 266579006   | Inflammatory disorder of breast |
| 139099          | 400097005   | Ingrowing nail                  |
| 4288544         | 396232000   | Inguinal hernia                 |

**Supplementary Table.** Falsification endpoint list (continued)

|         |           |                                               |
|---------|-----------|-----------------------------------------------|
| 444191  | 125593007 | Injury of face                                |
| 444130  | 125604000 | Injury of foot                                |
| 134222  | 125597008 | Injury of forearm                             |
| 4297984 | 76844004  | Local infection of wound                      |
| 4018050 | 10443009  | Localized infection                           |
| 439840  | 1415005   | Lymphangitis                                  |
| 4163232 | 45198002  | Mastitis                                      |
| 440389  | 91138005  | Mental retardation                            |
| 436100  | 60380001  | Narcolepsy                                    |
| 4262178 | 397732007 | Neurogenic dysfunction of the urinary bladder |
| 193874  | 8009008   | Nocturnal enuresis                            |
| 4171549 | 419153005 | Nodular goiter                                |
| 442274  | 52073004  | Oligomenorrhea                                |
| 4215978 | 414941008 | Onychomycosis                                 |
| 4171915 | 274718005 | Orchitis                                      |
| 380731  | 3135009   | Otitis externa                                |
| 378160  | 65668001  | Otorrhea                                      |
| 192606  | 60389000  | Paraplegia                                    |
| 253796  | 36118008  | Pneumothorax                                  |
| 195501  | 69878008  | Polycystic ovaries                            |
| 4164337 | 399505005 | Polyp of large intestine                      |
| 4153877 | 269406001 | Post-traumatic wound infection                |
| 434319  | 44001008  | Premature ejaculation                         |
| 373478  | 41256004  | Presbyopia                                    |
| 199876  | 73998008  | Prolapse of female genital organs             |
| 4295888 | 76641005  | Prolapse of intestine                         |
| 194997  | 9713002   | Prostatitis                                   |
| 4146239 | 267802000 | Pruritus of genital organs                    |
| 4285569 | 68633000  | Pupillary disorder                            |
| 81336   | 57773001  | Rectal prolapse                               |
| 380395  | 314407005 | Retinal dystrophy                             |
| 141825  | 267369002 | Simple goiter                                 |
| 137054  | 201066002 | Skin striae                                   |
| 434630  | 3745000   | Sleep-wake schedule disorder                  |
| 4195698 | 67801009  | Tenosynovitis                                 |
| 4339088 | 87860000  | Testicular mass                               |
| 133141  | 6020002   | Tinea pedis                                   |
| 440814  | 70070008  | Torticollis                                   |
| 435140  | 67426006  | Toxic effect of alcohol                       |
| 4270490 | 62994001  | Tracheitis                                    |
| 4028970 | 13617004  | Tracheobronchitis                             |
| 4114197 | 254968009 | Tumor of hypothalamus                         |
| 193326  | 87557004  | Urge incontinence of urine                    |
| 4092565 | 24976005  | Uterine prolapse                              |
| 140641  | 57019003  | Verruca vulgaris                              |
| 197036  | 197811007 | Vesicoureteric reflux                         |
| 133551  | 402567004 | Vesicular eczema of hands and/or feet         |
| 4223947 | 40468003  | Viral hepatitis, type A                       |
| 261326  | 75570004  | Viral pneumonia                               |

**eTable 1. Baseline characteristics of the Optum EHR database**

|                           | Before PS matching        |                           |           | After PS matching         |                            |           |
|---------------------------|---------------------------|---------------------------|-----------|---------------------------|----------------------------|-----------|
|                           | Ticagrelor<br>(n= 22 967) | Clopidogrel<br>(n=69 764) | Std. diff | Ticagrelor<br>(n= 16 414) | Clopidogrel<br>(n= 16 414) | Std. diff |
| Age group, % <sup>a</sup> |                           |                           |           |                           |                            |           |
| 30-34                     | 0.4                       | 0.3                       | 0.02      | 0.4                       | 0.4                        | 0.01      |
| 35-39                     | 1.3                       | 0.9                       | 0.04      | 1.2                       | 1.3                        | 0.01      |
| 40-44                     | 3.1                       | 2.2                       | 0.05      | 2.8                       | 2.7                        | <0.01     |
| 45-49                     | 6.3                       | 4.6                       | 0.07      | 5.7                       | 5.8                        | <0.01     |
| 50-54                     | 11.0                      | 8.4                       | 0.09      | 9.7                       | 9.9                        | 0.01      |
| 55-59                     | 15.1                      | 11.9                      | 0.09      | 14.0                      | 14.1                       | <0.01     |
| 60-64                     | 16.4                      | 13.8                      | 0.07      | 15.7                      | 15.9                       | <0.01     |
| 65-69                     | 14.7                      | 14.5                      | 0.01      | 14.9                      | 15.0                       | <0.01     |
| 70-74                     | 12.3                      | 14.1                      | 0.05      | 13.1                      | 12.9                       | <0.01     |
| 75-79                     | 9.5                       | 12.0                      | 0.08      | 10.4                      | 10.5                       | <0.01     |
| 80-84                     | 7.0                       | 13.2                      | 0.21      | 8.4                       | 8.0                        | 0.02      |
| 85-89                     | 2.9                       | 4.1                       | 0.07      | 3.5                       | 3.5                        | <0.01     |
| Gender: men, %            | 67.8                      | 65.2                      | 0.05      | 66.8                      | 66.9                       | <0.01     |
| Gender: women, %          | 32.2                      | 34.8                      | 0.05      | 33.2                      | 33.1                       | <0.01     |
| Race, % <sup>b</sup>      |                           |                           |           |                           |                            |           |
| Asian                     | 1.2                       | 1.0                       | 0.02      | 1.3                       | 1.2                        | 0.01      |
| Black or African American | 7.0                       | 6.6                       | 0.01      | 7.0                       | 7.1                        | <0.01     |
| White                     | 88.1                      | 88.9                      | 0.02      | 88.1                      | 87.9                       | 0.01      |
| Inclusion year, %         |                           |                           |           |                           |                            |           |
| 2011                      | 0.0                       | 2.2                       | 0.21      | 0.1                       | 0.1                        | 0.03      |

|                                        |      |      |       |      |      |       |
|----------------------------------------|------|------|-------|------|------|-------|
| 2012                                   | 2.2  | 13.6 | 0.43  | 3.0  | 2.8  | 0.01  |
| 2013                                   | 6.0  | 15.1 | 0.30  | 7.7  | 7.0  | 0.03  |
| 2014                                   | 10.5 | 16.3 | 0.17  | 12.4 | 11.4 | 0.03  |
| 2015                                   | 16.0 | 16.1 | <0.01 | 17.5 | 17.2 | 0.01  |
| 2016                                   | 16.1 | 13.2 | 0.08  | 16.9 | 16.8 | <0.01 |
| 2017                                   | 21.5 | 11.8 | 0.26  | 19.7 | 20.4 | 0.02  |
| 2018                                   | 21.9 | 9.7  | 0.34  | 18.4 | 19.6 | 0.03  |
| 2019                                   | 5.5  | 2.0  | 0.18  | 4.3  | 4.7  | 0.02  |
| Type of ACS, % <sup>c</sup>            |      |      |       |      |      |       |
| ST-elevation myocardial infarction     | 22.4 | 19.3 | 0.08  | 19.9 | 19.8 | <0.01 |
| Non-ST-elevation myocardial infarction | 31.3 | 35.4 | 0.09  | 32.4 | 32.0 | <0.08 |
| Unstable angina                        | 49.7 | 56.0 | 0.13  | 52.9 | 52.3 | 0.01  |
| Medical history, % <sup>d</sup>        |      |      |       |      |      |       |
| Congestive heart failure               | 15.0 | 21.4 | 0.17  | 16.2 | 15.9 | 0.01  |
| Essential hypertension                 | 76.7 | 78.8 | 0.05  | 77.8 | 77.9 | <0.01 |
| Hyperlipidemia                         | 72.0 | 76.2 | 0.10  | 73.4 | 72.7 | 0.01  |
| Peripheral arterial occlusive disease  | 0.5  | 1.0  | 0.06  | 0.7  | 0.7  | <0.01 |
| Persistent atrial fibrillation         | 0.6  | 0.8  | 0.03  | 0.7  | 0.8  | 0.01  |
| Renal failure syndrome                 | 0.7  | 1.2  | 0.05  | 0.9  | 0.8  | 0.01  |
| Type 1 diabetes mellitus               | 0.9  | 0.9  | <0.01 | 1.0  | 0.9  | 0.01  |
| Type 2 diabetes mellitus               | 14.4 | 12.0 | 0.07  | 14.1 | 14.3 | <0.01 |
| Medication, % <sup>e</sup>             |      |      |       |      |      |       |
| Abciximab                              | 2.0  | 2.5  | 0.03  | 1.9  | 1.8  | <0.01 |
| Apixaban                               | 1.2  | 1.4  | 0.02  | 1.4  | 1.5  | 0.01  |
| Aspirin                                | 97.9 | 97.1 | 0.05  | 97.6 | 97.7 | 0.01  |
| Dabigatran                             | 0.2  | 0.4  | 0.05  | 0.2  | 0.3  | 0.02  |

|                                                |              |              |      |              |              |       |
|------------------------------------------------|--------------|--------------|------|--------------|--------------|-------|
| Tirofiban                                      | 4.2          | 2.8          | 0.07 | 3.6          | 3.8          | 0.01  |
| Warfarin                                       | 2.0          | 5.5          | 0.18 | 2.6          | 2.6          | <0.01 |
| ACE inhibitors                                 | 46.7         | 47.6         | 0.02 | 46.0         | 45.9         | <0.01 |
| Angiotensin II antagonists                     | 16.7         | 17.5         | 0.02 | 17.6         | 17.0         | 0.01  |
| Beta blocking agents                           | 84.7         | 86.4         | 0.05 | 84.8         | 84.6         | 0.01  |
| Calcium channel blockers                       | 58.1         | 52.0         | 0.12 | 56.6         | 57.6         | 0.02  |
| Diuretics                                      | 31.0         | 38.5         | 0.16 | 32.7         | 32.2         | 0.01  |
| HMG CoA reductase inhibitors                   | 92.0         | 89.4         | 0.09 | 90.8         | 91.0         | 0.01  |
| Blood glucose lowering drugs, except. Insulins | 17.8         | 19.6         | 0.05 | 18.6         | 18.4         | <0.01 |
| Insulins and analogues                         | 27.7         | 31.4         | 0.08 | 28.7         | 28.5         | <0.01 |
| Proton pump inhibitors                         | 35.7         | 39.4         | 0.08 | 36.9         | 36.8         | <0.01 |
| Laboratory values, mean (%) <sup>f</sup>       |              |              |      |              |              |       |
| Body mass index, kg/m <sup>2</sup>             | 28.9 (94.8)  | 28.3 (93.7)  | 0.06 | 28.6 (94.3)  | 28.7 (94.7)  | <0.01 |
| Systolic blood pressure, mmHg                  | 129.6 (98.8) | 127.2 (97.8) | 0.08 | 129.3 (98.5) | 129 (98.7)   | 0.01  |
| Diastolic blood pressure, mmHg                 | 74.7 (98.8)  | 70.7 (97.8)  | 0.22 | 73.5 (98.5)  | 73.6 (98.7)  | <0.01 |
| Hemoglobin, g/dL                               | 11.5 (91.9)  | 10.8 (89.9)  | 0.13 | 11.1 (90.3)  | 11.1 (90.6)  | <0.01 |
| Blood glucose, mg/dL                           | 126.9 (93.3) | 122.6 (92)   | 0.06 | 123.6 (92)   | 123.6 (92.5) | <0.01 |
| Cholesterol in LDL, mg/dL                      | 41.9 (41.2)  | 39.9 (41.9)  | 0.04 | 41.5 (41.3)  | 40.8 (41.2)  | 0.01  |
| Creatine kinase.MB, ng/ml                      | 8.7 (24.2)   | 8.3 (32.9)   | 0.01 | 8.6 (26.1)   | 7.7 (25)     | 0.02  |

Values are presented as proportion of the patients (%) unless otherwise indicated.

To account for baseline differences between patients with ticagrelor and clopidogrel, PS-based matching was used. PSs were calculated in each database independently, based on available demographic characteristics, as well as the medical, medication, procedure, device exposure history, and baseline laboratory values of in each database. Here, we reported the aggregated balance before and after matching only for limited covariates from three databases. The whole balance data before and after PS adjustment for more than 10,000 baseline covariates in each database are available at <https://github.com/OHDSI/ShinyDeploy/tree/master/TicagrelorVsClopidogrel/data>.

<sup>a</sup>Age group under 30 or over 90 was omitted.

<sup>b</sup>The Optum EHR data dictionary reports race as fixed categories (African American, Asian, Caucasian, and Other/Unknown) dependent on statistical de-identification rules for race based on geography, if insufficient Asians are represented in a particular geography they are “rolled up” to Unknown.

<sup>c</sup>Types of ACS were identified by coded medical diagnosis within 7 days to the catheterization. The proportion of each type of ACS can be over- or underestimated, because some patients might have more than 1 diagnoses for ACS while more specific diagnoses (eg, ST-elevation myocardial infarction of anterior wall) were not reported here.

<sup>d</sup>Medical history was identified by coded medical diagnosis within 1 year prior to the catheterization.

<sup>e</sup>Short-term medication use was identified by medication records within 7 days of catheterization. Both ATC class-level and ingredient-level drug uses were used to fit PS model. We reported ingredient-level balances for antithrombotic agents, while class-level balances for other drugs before and after PS matching.

<sup>f</sup>The proportions in performance of laboratory test in each population are reported as percent (eg, 94.8% of ticagrelor group before matching were tested for body mass index, and mean of body mass index among them was 28.9 kg/m<sup>2</sup>)

Abbreviation: EHR, electronic health record; Std.diff, standardized difference; PS, propensity score; ACS, acute coronary syndrome; ACE, angiotensin converting enzyme

**eTable 2. Baseline characteristics of the IQVIA-Hospital database**

|                           | Before PS matching       |                            |           | After PS matching       |                          |           |
|---------------------------|--------------------------|----------------------------|-----------|-------------------------|--------------------------|-----------|
|                           | Ticagrelor<br>(n= 5 276) | Clopidogrel<br>(n= 15 463) | Std. diff | Ticagrelor<br>(n=3 998) | Clopidogrel<br>(n=3 998) | Std. diff |
| Age group, % <sup>a</sup> |                          |                            |           |                         |                          |           |
| 30-34                     | 0.3                      | 0.3                        | <0.01     | 0.3                     | 0.4                      | 0.01      |
| 35-39                     | 1.0                      | 0.9                        | 0.01      | 1.1                     | 0.9                      | 0.02      |
| 40-44                     | 3.0                      | 2.3                        | 0.04      | 2.9                     | 2.9                      | <0.01     |
| 45-49                     | 5.9                      | 4.7                        | 0.05      | 5.4                     | 5.2                      | 0.01      |
| 50-54                     | 10.2                     | 8.5                        | 0.06      | 9.7                     | 9.4                      | 0.01      |
| 55-59                     | 14.6                     | 12.4                       | 0.06      | 14.1                    | 13.5                     | 0.02      |
| 60-64                     | 16.0                     | 14.1                       | 0.05      | 15.2                    | 15.2                     | <0.01     |
| 65-69                     | 16.1                     | 16.1                       | <0.01     | 16.2                    | 16.8                     | 0.02      |
| 70-74                     | 14.3                     | 15.5                       | 0.03      | 15.2                    | 15.3                     | <0.01     |
| 75-79                     | 11.3                     | 13.3                       | 0.06      | 11.5                    | 11.9                     | 0.01      |
| 80-84                     | 6.1                      | 9.8                        | 0.14      | 7.3                     | 6.9                      | 0.01      |
| 85-89                     | 1.1                      | 2.0                        | 0.08      | 1.3                     | 1.5                      | 0.02      |
| Gender: male, %           | 65.4                     | 63.4                       | 0.04      | 63.1                    | 62.8                     | 0.01      |
| Gender: female, %         | 34.4                     | 36.4                       | 0.04      | 36.7                    | 37.0                     | 0.01      |
| Inclusion year, %         |                          |                            |           |                         |                          |           |
| 2011                      | 0.1                      | 2.6                        | 0.22      | 0.2                     | 0.2                      | 0.01      |
| 2012                      | 3.3                      | 17.6                       | 0.48      | 5.0                     | 3.7                      | 0.07      |
| 2013                      | 9.5                      | 18.6                       | 0.26      | 13.1                    | 11.5                     | 0.05      |
| 2014                      | 14.7                     | 17.4                       | 0.07      | 18.3                    | 17.9                     | 0.01      |
| 2015                      | 16.4                     | 14.9                       | 0.04      | 18.6                    | 18.6                     | <0.01     |
| 2016                      | 16.1                     | 10.4                       | 0.17      | 16.1                    | 15.9                     | <0.01     |

|                                        |      |      |       |      |      |       |
|----------------------------------------|------|------|-------|------|------|-------|
| 2017                                   | 25.4 | 12.1 | 0.35  | 19.1 | 22.0 | 0.07  |
| 2018                                   | 14.5 | 6.4  | 0.27  | 9.7  | 10.2 | 0.02  |
| Type of ACS <sup>b</sup>               |      |      |       |      |      |       |
| ST-elevation myocardial infarction     | 3.7  | 4.5  | 0.04  | 4.4  | 4.6  | 0.01  |
| Non-ST-elevation myocardial infarction | 10.9 | 22.2 | 0.31  | 14.6 | 13.7 | 0.02  |
| Unstable angina                        | 41.4 | 49.7 | 0.17  | 42.4 | 40.4 | 0.04  |
| Medical history, % <sup>c</sup>        |      |      |       |      |      |       |
| Congestive heart failure               | 5.7  | 9.7  | 0.15  | 6.7  | 6.4  | 0.01  |
| Essential hypertension                 | 47.1 | 51.0 | 0.08  | 48.5 | 46.9 | 0.03  |
| Hyperlipidemia                         | 37.4 | 44.0 | 0.14  | 38.0 | 36.9 | 0.02  |
| Peripheral arterial occlusive disease  | 0.1  | 0.2  | 0.03  | 0.1  | 0.2  | 0.01  |
| Persistent atrial fibrillation         | 0.1  | 0.2  | 0.01  | 0.1  | 0.3  | 0.06  |
| Renal failure syndrome                 | 0.1  | 0.3  | 0.04  | 0.1  | 0.2  | 0.02  |
| Type 1 diabetes mellitus               | 0.6  | 0.9  | 0.03  | 0.7  | 0.6  | 0.02  |
| Type 2 diabetes mellitus               | 15.4 | 23.4 | 0.20  | 18.2 | 16.7 | 0.04  |
| Medication, % <sup>d</sup>             |      |      |       |      |      |       |
| Abciximab                              | 1.5  | 1.6  | 0.01  | 1.5  | 1.9  | 0.03  |
| Apixaban                               | 0.3  | 0.3  | <0.01 | 0.5  | 0.4  | 0.01  |
| Aspirin                                | 75.2 | 76.5 | 0.03  | 75.3 | 75.0 | 0.01  |
| Dabigatran                             | 0.0  | 0.1  | 0.03  | 0.1  | 0.1  | 0.01  |
| Tirofiban                              | 5.3  | 2.7  | 0.13  | 4.8  | 4.9  | <0.01 |
| Warfarin                               | 0.7  | 2.2  | 0.12  | 1.0  | 1.4  | 0.04  |
| ACE inhibitors                         | 25.6 | 29.0 | 0.08  | 26.3 | 25.4 | 0.02  |
| Angiotensin II antagonists             | 9.9  | 10.7 | 0.03  | 9.7  | 10.1 | 0.01  |
| Beta blocking agents                   | 68.0 | 70.8 | 0.06  | 68.4 | 69.3 | 0.02  |
| Calcium channel blockers               | 46.7 | 40.7 | 0.12  | 42.8 | 44.6 | 0.04  |



|                                                |      |      |       |      |      |       |
|------------------------------------------------|------|------|-------|------|------|-------|
| Diuretics                                      | 17.4 | 22.1 | 0.12  | 18.6 | 18.0 | 0.01  |
| HMG CoA reductase inhibitors                   | 73.4 | 73.2 | <0.01 | 73.0 | 72.9 | <0.01 |
| Blood glucose lowering drugs, except. Insulins | 4.2  | 6.7  | 0.11  | 4.5  | 4.3  | 0.01  |
| Insulins and analogues                         | 8.3  | 13.1 | 0.15  | 9.9  | 9.6  | 0.01  |
| Proton pump inhibitors                         | 24.4 | 27.1 | 0.06  | 25.2 | 24.4 | 0.02  |

Values are presented as proportion of the patients (%) unless otherwise indicated.

To account for baseline differences between patients with ticagrelor and clopidogrel, PS-based matching was used. PSs were calculated in each database independently, based on available demographic characteristics, as well as the medical, medication, procedure, device exposure history, and baseline laboratory values of in each database. Here, we reported the aggregated balance before and after matching only for limited covariates from three databases. The whole balance data before and after PS adjustment for more than 10,000 baseline covariates in each database are available at <https://github.com/OHDSI/ShinyDeploy/tree/master/TicagrelorVsClopidogrel/data>.

<sup>a</sup>Age group under 30 or over 90 was omitted.

<sup>b</sup>Types of ACS were identified by coded medical diagnosis within 7 days to the catheterization. The proportion of each type of ACS can be over- or underestimated, because some patients might have more than 1 diagnoses for ACS while more specific diagnoses (eg, ST-elevation myocardial infarction of anterior wall) were not reported here.

<sup>c</sup>Medical history was identified by coded medical diagnosis within 1 year prior to the catheterization.

<sup>d</sup>Short-term medication use was identified by medication records within 7 days of catheterization. Both ATC class-level and ingredient-level drug uses were used to fit PS model. We reported ingredient-level balances for antithrombotic agents, while class-level balances for other drugs before and after PS matching.

Abbreviation: Std.diff, standardized difference; PS, propensity score; ACS, acute coronary syndrome; ACE, angiotensin converting enzyme

**eTable 3. Baseline characteristics of the HIRA database**

|                                    | Before PS matching        |                            |           | After PS matching         |                            |           |
|------------------------------------|---------------------------|----------------------------|-----------|---------------------------|----------------------------|-----------|
|                                    | Ticagrelor<br>(n= 15 335) | Clopidogrel<br>(n= 54 774) | Std. diff | Ticagrelor<br>(n= 10 878) | Clopidogrel<br>(n= 10 878) | Std. diff |
| Age group, %                       |                           |                            |           |                           |                            |           |
| 30-34                              | 0.8                       | 0.4                        | 0.05      | 0.8                       | 0.7                        | 0.02      |
| 35-39                              | 2.3                       | 1.2                        | 0.08      | 2.0                       | 2.2                        | 0.01      |
| 40-44                              | 5.9                       | 3.2                        | 0.13      | 5.1                       | 5.2                        | 0.01      |
| 45-49                              | 10.2                      | 6.2                        | 0.15      | 9.3                       | 9.6                        | 0.01      |
| 50-54                              | 14.2                      | 10.3                       | 0.12      | 13.4                      | 13.6                       | <0.01     |
| 55-59                              | 17.2                      | 13.3                       | 0.11      | 16.5                      | 15.9                       | 0.02      |
| 60-64                              | 14.7                      | 14.0                       | 0.02      | 14.8                      | 15.6                       | 0.02      |
| 65-69                              | 11.2                      | 13.5                       | 0.07      | 12.0                      | 11.9                       | <0.01     |
| 70-74                              | 10.0                      | 14.2                       | 0.13      | 10.9                      | 10.5                       | 0.02      |
| 75-79                              | 7.4                       | 12.4                       | 0.17      | 8.4                       | 8.1                        | 0.01      |
| 80-84                              | 3.9                       | 7.4                        | 0.15      | 4.5                       | 4.3                        | 0.01      |
| 85-89                              | 1.5                       | 3.0                        | 0.10      | 1.7                       | 1.8                        | <0.01     |
| Gender: men, %                     | 81.2                      | 69.3                       | 0.28      | 79.1                      | 79.6                       | 0.01      |
| Gender: women, %                   | 18.8                      | 30.7                       | 0.28      | 20.9                      | 20.4                       | 0.01      |
| Inclusion year, %                  |                           |                            |           |                           |                            |           |
| 2013                               | 7.8                       | 26.8                       | 0.52      | 10.6                      | 9.7                        | 0.03      |
| 2014                               | 23.3                      | 27.0                       | 0.08      | 26.6                      | 26.8                       | 0.01      |
| 2015                               | 30.6                      | 23.0                       | 0.17      | 29.9                      | 29.8                       | <0.01     |
| 2016                               | 38.2                      | 23.2                       | 0.33      | 32.9                      | 33.7                       | 0.02      |
| Type of ACS                        |                           |                            |           |                           |                            |           |
| ST-elevation myocardial infarction | 49.6                      | 30.9                       | 0.39      | 44.9                      | 46.2                       | 0.03      |

|                                                |      |      |      |      |      |       |
|------------------------------------------------|------|------|------|------|------|-------|
| Non-ST-elevation myocardial infarction         | 19.9 | 14.2 | 0.15 | 20.2 | 20.7 | 0.01  |
| Unstable angina                                | 24.8 | 55.8 | 0.67 | 32.8 | 29.9 | 0.06  |
| Medical history, %                             |      |      |      |      |      |       |
| Congestive heart failure                       | 6.7  | 9.0  | 0.08 | 7.2  | 7.3  | 0.01  |
| Essential hypertension                         | 71.8 | 78.3 | 0.15 | 73.3 | 72.8 | 0.01  |
| Hyperlipidemia                                 | 70.3 | 71.1 | 0.02 | 70.8 | 70.9 | <0.01 |
| Peripheral arterial occlusive disease          | 0.8  | 1.1  | 0.03 | 0.9  | 0.7  | 0.02  |
| Persistent atrial fibrillation                 | 0.1  | 0.3  | 0.04 | 0.1  | 0.2  | 0.02  |
| Renal failure syndrome                         | 0.5  | 0.9  | 0.05 | 0.5  | 0.7  | 0.02  |
| Type 1 diabetes mellitus                       | 0.2  | 0.1  | 0.01 | 0.2  | 0.1  | 0.03  |
| Type 2 diabetes mellitus                       | 0.4  | 0.5  | 0.01 | 0.5  | 0.4  | 0.01  |
| Medication, %                                  |      |      |      |      |      |       |
| Abciximab                                      | 17.6 | 7.6  | 0.30 | 12.9 | 14.0 | 0.03  |
| Apixaban                                       | 0.1  | 0.2  | 0.03 | 0.1  | 0.1  | 0.01  |
| Aspirin                                        | 99.8 | 99.7 | 0.03 | 99.8 | 99.9 | <0.01 |
| Dabigatran                                     | 0.0  | 0.1  | 0.04 | 0.0  | 0.1  | 0.03  |
| Warfarin                                       | 0.9  | 2.2  | 0.10 | 1.1  | 1.1  | <0.01 |
| ACE inhibitors                                 | 40.2 | 34.0 | 0.13 | 40.0 | 40.6 | 0.01  |
| Angiotensin II antagonists                     | 37.1 | 42.1 | 0.10 | 39.1 | 39.1 | <0.01 |
| Beta blocking agents                           | 78.4 | 72.8 | 0.13 | 78.5 | 79.3 | 0.02  |
| Calcium channel blockers                       | 44.0 | 55.1 | 0.22 | 47.3 | 45.8 | 0.03  |
| Diuretics                                      | 34.3 | 37.9 | 0.08 | 33.8 | 33.5 | 0.01  |
| HMG CoA reductase inhibitors                   | 96.3 | 93.5 | 0.13 | 96.8 | 97.0 | 0.01  |
| Blood glucose lowering drugs, except. Insulins | 23.8 | 27.9 | 0.09 | 25.0 | 23.6 | 0.03  |
| Insulins and analogues                         | 12.6 | 13.0 | 0.01 | 11.9 | 11.6 | 0.01  |
| Proton pump inhibitors                         | 41.8 | 36.9 | 0.10 | 40.7 | 41.5 | 0.02  |

Device, %

|                                    |      |      |      |      |      |       |
|------------------------------------|------|------|------|------|------|-------|
| Drug-eluting coronary artery stent | 94.8 | 93.9 | 0.04 | 95.0 | 95.1 | <0.01 |
|------------------------------------|------|------|------|------|------|-------|

Values are presented as proportion of the patients (%) unless otherwise indicated.

To account for baseline differences between patients with ticagrelor and clopidogrel, PS-based matching was used. PSs were calculated in each database independently, based on available demographic characteristics, as well as the medical, medication, procedure, device exposure history, and baseline laboratory values of in each database. Here, we reported the aggregated balance before and after matching only for limited covariates from three databases. The whole balance data before and after PS adjustment for more than 10,000 baseline covariates in each database are available at <https://github.com/OHDSI/ShinyDeploy/tree/master/TicagrelorVsClopidogrel/data>.

<sup>a</sup>Age group under 30 or over 90 was omitted.

<sup>b</sup>Types of ACS were identified by coded medical diagnosis within 7 days to the catheterization. The proportion of each type of ACS can be over- or underestimated, because some patients might have more than 1 diagnoses for ACS while more specific diagnoses (eg, ST-elevation myocardial infarction of anterior wall) were not reported here.

<sup>c</sup>Medical history was identified by coded medical diagnosis within 1 year prior to the catheterization.

<sup>d</sup>Short-term medication use was identified by medication records within 7 days of catheterization. Both ATC class-level and ingredient-level drug uses were used to fit PS model. We reported ingredient-level balances for antithrombotic agents, while class-level balances for other drugs before and after PS matching.

Abbreviation: HIRA, health insurance review and assessment service; Std.diff, standardized difference; PS, propensity score; ACS, acute coronary syndrome; ACE, angiotensin converting enzyme

**eTable 4. Patient cohort sizes, primary endpoint events, incidence rates, and minimum detectable relative risk**

|              | Patients, n |         | PYs, n*year |         | Events, n |        | IR, /1000PYs |        | MDRR |
|--------------|-------------|---------|-------------|---------|-----------|--------|--------------|--------|------|
|              | T           | C       | T           | C       | T         | C      | T            | C      |      |
| 1 year       |             |         |             |         |           |        |              |        |      |
| Before PSM   | 43 578      | 140 001 | 31 197      | 110 939 | 4 824     | 15 851 | 154.63       | 142.88 | 1.05 |
| After PSM    | 31 290      | 31 290  | 23 116      | 22 587  | 3 484     | 3 290  | 150.71       | 145.65 | 1.07 |
| 5 year       |             |         |             |         |           |        |              |        |      |
| Before PSM   | 43 578      | 140 001 | 65 203      | 300 759 | 6 613     | 25 093 | 101.42       | 83.43  | 1.04 |
| After PSM    | 31 290      | 31 290  | 51 201      | 49 191  | 4 920     | 4 616  | 96.09        | 93.84  | 1.06 |
| On-treatment |             |         |             |         |           |        |              |        |      |
| Before PSM   | 31 002      | 99 520  | 7 834       | 49 262  | 2 365     | 9 226  | 301.89       | 187.28 | 1.06 |
| After PSM    | 13 802      | 13 802  | 4 845       | 6 907   | 1 328     | 1 627  | 274.07       | 235.54 | 1.11 |

We report total number of patients, follow-up duration (in years), number of incident NACE (recurrent acute myocardial infarction, revascularization, ischemic stroke, hemorrhagic stroke, or gastrointestinal bleeding) during time-at-risks, incidence rate of NACE before and after propensity score matching from three databases. We also report MDRR for each comparison. Note that the incidence rate does not account for propensity score adjustment. The complete set of results is available at an interactive website ([www.data.ohdsi.org/TicagrelorVsClopidogrel](http://www.data.ohdsi.org/TicagrelorVsClopidogrel)).

Abbreviation: T, ticagrelor; C, clopidogrel; PSM, propensity score matching; PY, person-year; IR, incidence rate; MDRR, minimum detectable relative risk; NACE, net adverse clinical event

**eTable 5. Drug adherence after the index date in the HIRA database**

|                 |                                | Ticagrelor       | Clopidogrel      | <i>P</i> <sup>c</sup> |
|-----------------|--------------------------------|------------------|------------------|-----------------------|
| MPR at 1 month  | Observed patients, n           | 10424            | 10402            |                       |
|                 | Mean (SD)                      | 0.63 (0.40)      | 0.78 (0.35)      |                       |
|                 | Median (IQR)                   | 0.84 (0.18-1.00) | 1.00 (0.58-1.00) |                       |
|                 | High adherence, % <sup>a</sup> | 51.4             | 69.8             | <0.001                |
|                 | Full adherence, % <sup>b</sup> | 40.6             | 60.5             | <0.001                |
| MPR at 6 months | Observed patients, n           | 8850             | 8608             |                       |
|                 | Mean (SD)                      | 0.61 (0.40)      | 0.76 (0.36)      |                       |
|                 | Median (IQR)                   | 0.76 (0.14-1.00) | 1.00 (0.54-1.00) |                       |
|                 | High adherence, % <sup>a</sup> | 48.4             | 68.4             | <0.001                |
|                 | Full adherence, % <sup>b</sup> | 36.3             | 57.8             | <0.001                |
| MPR at 1 year   | Observed patients, n           | 6865             | 6738             |                       |
|                 | Mean (SD)                      | 0.59 (0.40)      | 0.77 (0.36)      |                       |
|                 | Median (IQR)                   | 0.72 (0.13-1.00) | 1.00 (0.55-1.00) |                       |
|                 | High adherence, % <sup>a</sup> | 47.0             | 68.2             | <0.001                |
|                 | Full adherence, % <sup>b</sup> | 32.9             | 56.4             | <0.001                |

MPR is defined by the sum of the days supplied of all prescriptions filled for the allocated drug (ticagrelor or clopidogrel) in a given time period divided by the number of the days in the time-at-risk period until certain time points (30, 180 days and 365 days). The MPRs were calculated as the measures of adherence at 1 month, 6 months, and 1 year after the percutaneous coronary intervention.

<sup>a</sup>High adherence to the allocated drug is defined as MPR of 80% or higher

<sup>b</sup>Full adherence to the allocated drug is defined as MPR of 100%

<sup>c</sup>The proportions of high and full adherence to the allocated drug in the ticagrelor and clopidogrel group were compared by using  $\chi^2$  test at each time point.

Abbreviation: HIRA, health insurance review and assessment service; MPR, medical possession ratio; SD, standard deviation; IQR, interquartile range

**eTable 6. Incidence rate difference using random-effects meta-analysis**

| Outcome                          | Patients, n |        | PYs, n*year |        | IR, / 1000 PYs <sup>a</sup> |        | Random-effects meta-analysis |                                                    |              |       |
|----------------------------------|-------------|--------|-------------|--------|-----------------------------|--------|------------------------------|----------------------------------------------------|--------------|-------|
|                                  | T           | C      | T           | C      | T                           | C      | I <sup>2</sup>               | Incidence rate difference, / 1000 PYs <sup>b</sup> | 95% CI       | P     |
| NACE                             | 31 290      | 31 290 | 23 116      | 22 587 | 150.71                      | 145.65 | 0.00                         | 5.9                                                | -0.6 to 12.4 | 0.078 |
| NACE or mortality                | 31 290      | 31 290 | 23 101      | 22 569 | 168.34                      | 165.53 | 0.00                         | 2.8                                                | -4.3 to 10   | 0.437 |
| Ischemic event                   | 31 290      | 31 290 | 23 274      | 22 711 | 135.21                      | 133.50 | 0.00                         | 3.1                                                | -2.9 to 9.2  | 0.313 |
| Ischemic stroke                  | 31 290      | 31 290 | 24 985      | 24 292 | 7.48                        | 8.15   | 0.00                         | -0.9                                               | -2.3 to 0.6  | 0.248 |
| Recurrent AMI                    | 31 290      | 31 290 | 23 941      | 23 331 | 81.16                       | 81.82  | 0.14                         | -0.2                                               | -5.4 to 5.1  | 0.951 |
| Revascularization                | 31 290      | 31 290 | 24 521      | 23 889 | 42.74                       | 42.99  | 0.81                         | 0.5                                                | -9.4 to 10.5 | 0.914 |
| Hemorrhagic event                | 31 290      | 31 290 | 24 811      | 24 212 | 21.36                       | 15.69  | 0.49                         | 5.6                                                | 1.8 to 9.4   | 0.004 |
| Hemorrhagic stroke               | 31 290      | 31 290 | 25 031      | 24 372 | 2.96                        | 1.85   | 0.00                         | 1.1                                                | 0.3 to 2     | 0.009 |
| GI bleeding                      | 31 290      | 31 290 | 24 839      | 24 229 | 19.00                       | 14.11  | 0.68                         | 4.8                                                | 0.1 to 9.5   | 0.043 |
| All-cause mortality              | 31 290      | 31 290 | 25 048      | 24 373 | 19.60                       | 21.29  | 0.72                         | -0.9                                               | -5.8 to 4    | 0.718 |
| Dyspnea                          | 31 290      | 31 290 | 21 390      | 21 518 | 272.64                      | 226.32 | 0.97                         | 42.6                                               | -10 to 95.2  | 0.112 |
| Cardiovascular-related mortality | 27 292      | 27 292 | 22 469      | 21 887 | 14.29                       | 15.49  | 0.78                         | -0.7                                               | -5.1 to 3.7  | 0.754 |
| MACE                             | 27 292      | 27 292 | 21 716      | 21 183 | 72.85                       | 71.85  | 0.76                         | 1.9                                                | -8.2 to 12.1 | 0.710 |

NACE includes recurrent acute myocardial infarction, revascularization, ischemic stroke, hemorrhagic stroke, and GI bleeding. MACE includes cardiovascular-related mortality, recurrent AMI, and stroke. The complete set of results is available at an interactive website ([www.data.ohdsi.org/TicagrelorVsClopidogrel](http://www.data.ohdsi.org/TicagrelorVsClopidogrel)).

<sup>a</sup>The Incidence rate of each outcome was calculated by simple mean of incidence rates from three databases.

<sup>b</sup>The incidence rate difference of each outcome between ticagrelor and clopidogrel group was calculated by using random-effects meta-analysis. The positive value indicates more outcome occurred in ticagrelor group than clopidogrel group, and vice versa.

Abbreviation: T, ticagrelor; C, clopidogrel; PY, person-year; IR, incidence rate; NACE, net adverse clinical event; AMI, acute myocardial infarction; GI, gastrointestinal; MACE, major adverse cardiovascular event

**eTable 7. Incidence rates of secondary endpoint events at one year in the ticagrelor groups from this study and TICA-KOREA.**

| Outcomes          | Study      | Event / PYs   | 95% CI    |
|-------------------|------------|---------------|-----------|
| GI bleeding       | Our study  | 472 / 24 839  | 1.90-2.08 |
|                   | TICA-KOREA | 6 / 387       | 0.64-3.20 |
| ICH               | Our study  | 74 / 25 031   | 0.23-0.37 |
|                   | TICA-KOREA | 1 / 387       | 0.02-1.20 |
| Recurrent AMI     | Our study  | 1943 / 23 941 | 7.76-8.48 |
|                   | TICA-KOREA | 20 / 387      | 3.26-7.82 |
| Ischemic stroke   | Our study  | 187 / 24 985  | 0.65-0.86 |
|                   | TICA-KOREA | 5 / 387       | 0.49-2.83 |
| Revascularization | Our study  | 1048 / 24 504 | 4.02-4.54 |
|                   | TICA-KOREA | 10 / 387      | 1.33-4.58 |

We compared confidence intervals of incidences for individual secondary endpoints of ischemic and hemorrhagic events in the ticagrelor group from our study with those from the most recent head-to-head randomized trials between ticagrelor vs clopidogrel (TICA-KOREA).<sup>5</sup> As shown in the table, all of the confidence intervals are overlapped between our results and the results from the TICA-KOREA.

Abbreviation: T, ticagrelor; C, clopidogrel; PY, person-year; CI, confidence interval; GI, gastrointestinal; ICH, intra-cerebral hemorrhage; AMI, acute myocardial infarction



**eFigure 1. Proportion of ticagrelor group among the whole study population, 2011-2019**

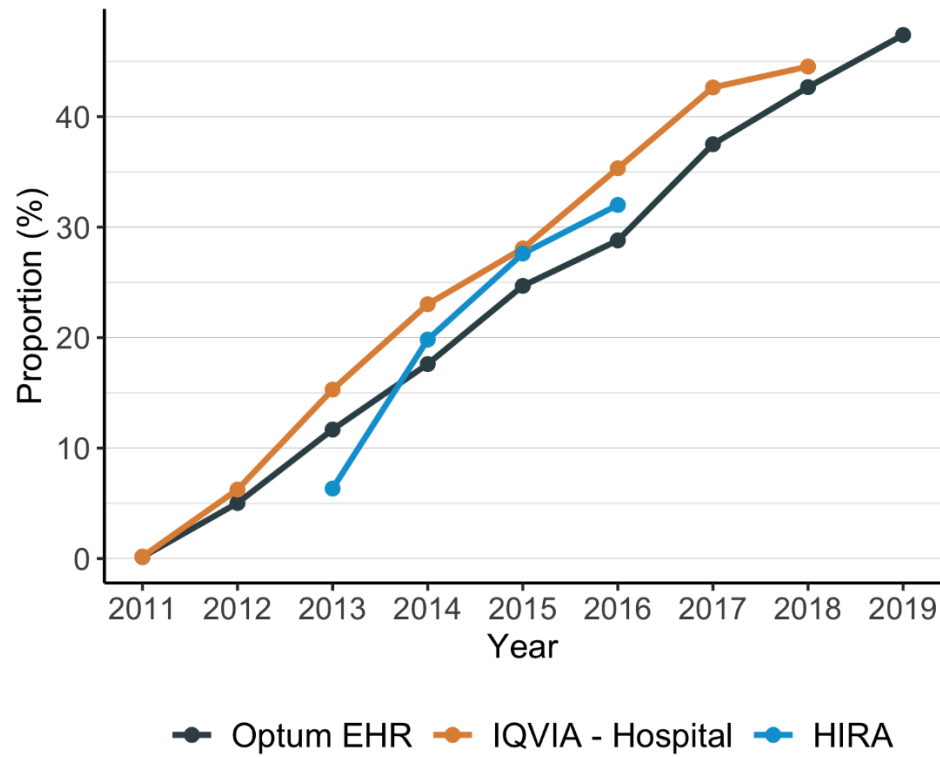

The lines represent the proportion of patients who allocated to ticagrelor group among the whole study population in three different databases from US (Optum EHR and IQVIA-Hospital) and South Korea (HIRA).

Abbreviation: Optum EHR, Optum electronic health record; HIRA, health insurance review and assessment service

**eFigure 2. Covariate balance plot before and after propensity score matching**

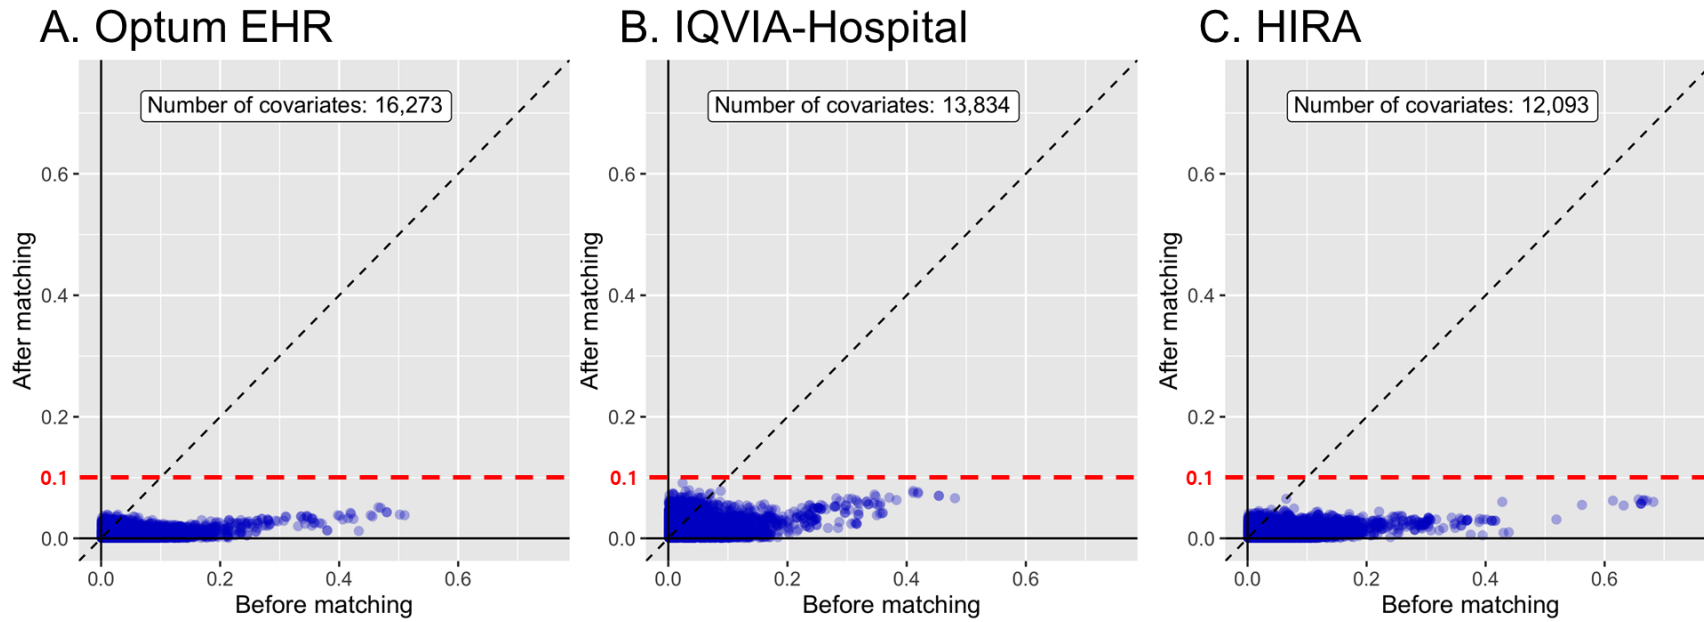

The covariate balances before and after PS matching were depicted. After PS matching, every standardized mean difference from more than 10,000 covariates does not exceed 0.1, which is depicted by red line. The complete set of results is available at an interactive website ([www.data.ohdsi.org/TicagrelorVsClopidogrel](http://www.data.ohdsi.org/TicagrelorVsClopidogrel)).

Abbreviation: Optum EHR, Optum electronic health record; HIRA, health insurance review and assessment service; PS, propensity score

**eFigure 3. Systematic error control of effect estimation in the meta-analysis comparing the risk of net adverse clinical event between the ticagrelor and clopidogrel group under one-year, 1-to-1 propensity score matching design**

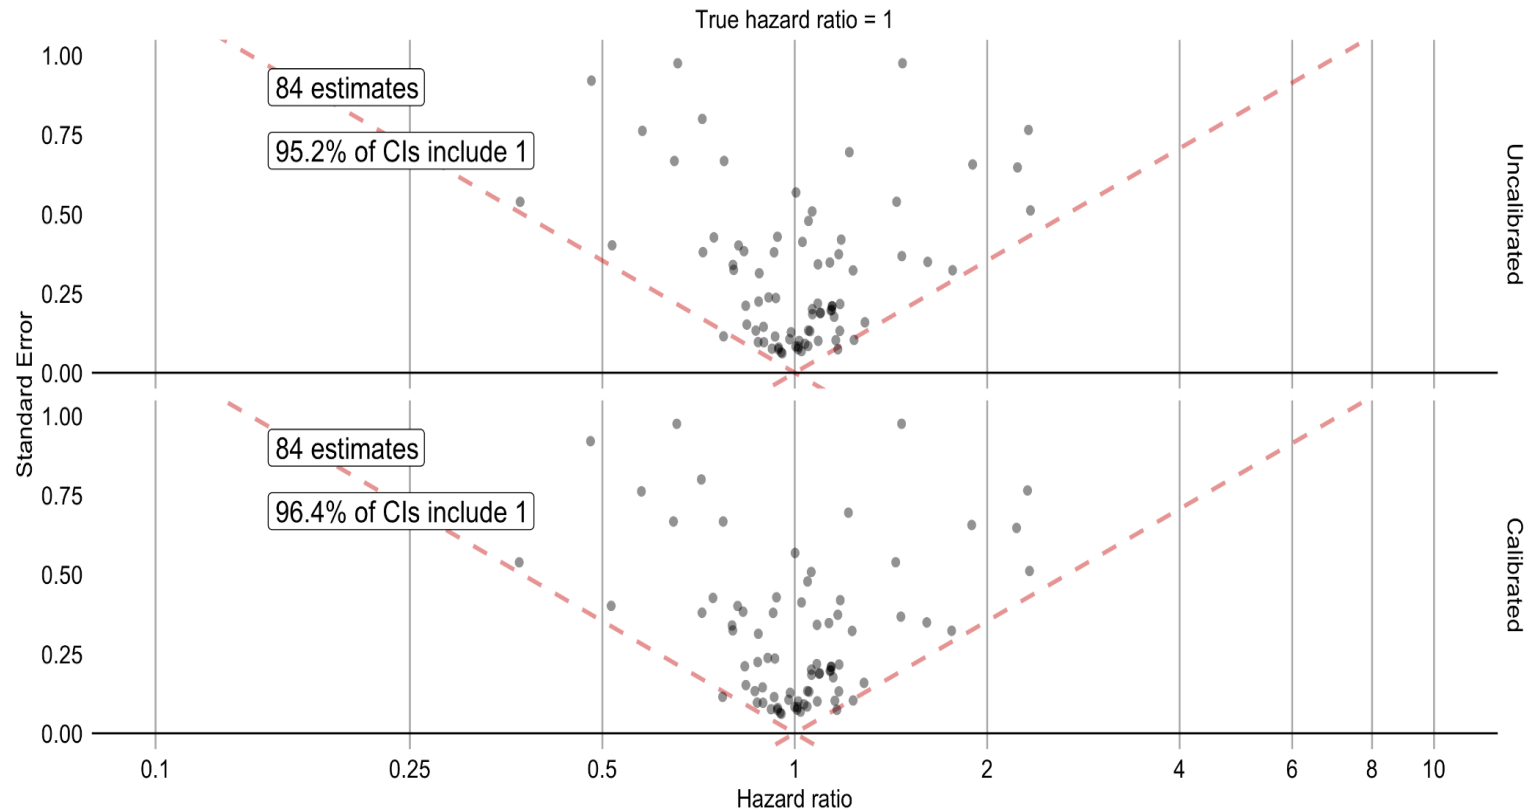

The funnel plots describe the hazard ratio and standard error of each summary estimate of falsification endpoints in meta-analysis. Top plot is the result before calibration and bottom plot is the result after calibration of confidence interval. Nominal 95% confidence intervals cover 95.2% (80/84) and 96.4% (81/84) before and after calibration of confidence interval, respectively. The complete set of results is available at an interactive website ([www.data.ohdsi.org/TicagrelorVsClopidogrel](http://www.data.ohdsi.org/TicagrelorVsClopidogrel)).

**eFigure 4. Sensitivity analyses for risks of the primary outcome (NACE) associated with ticagrelor and clopidogrel use, analyzed using a meta-analysis and various time-at-risk, statistical, and clinical definition settings**

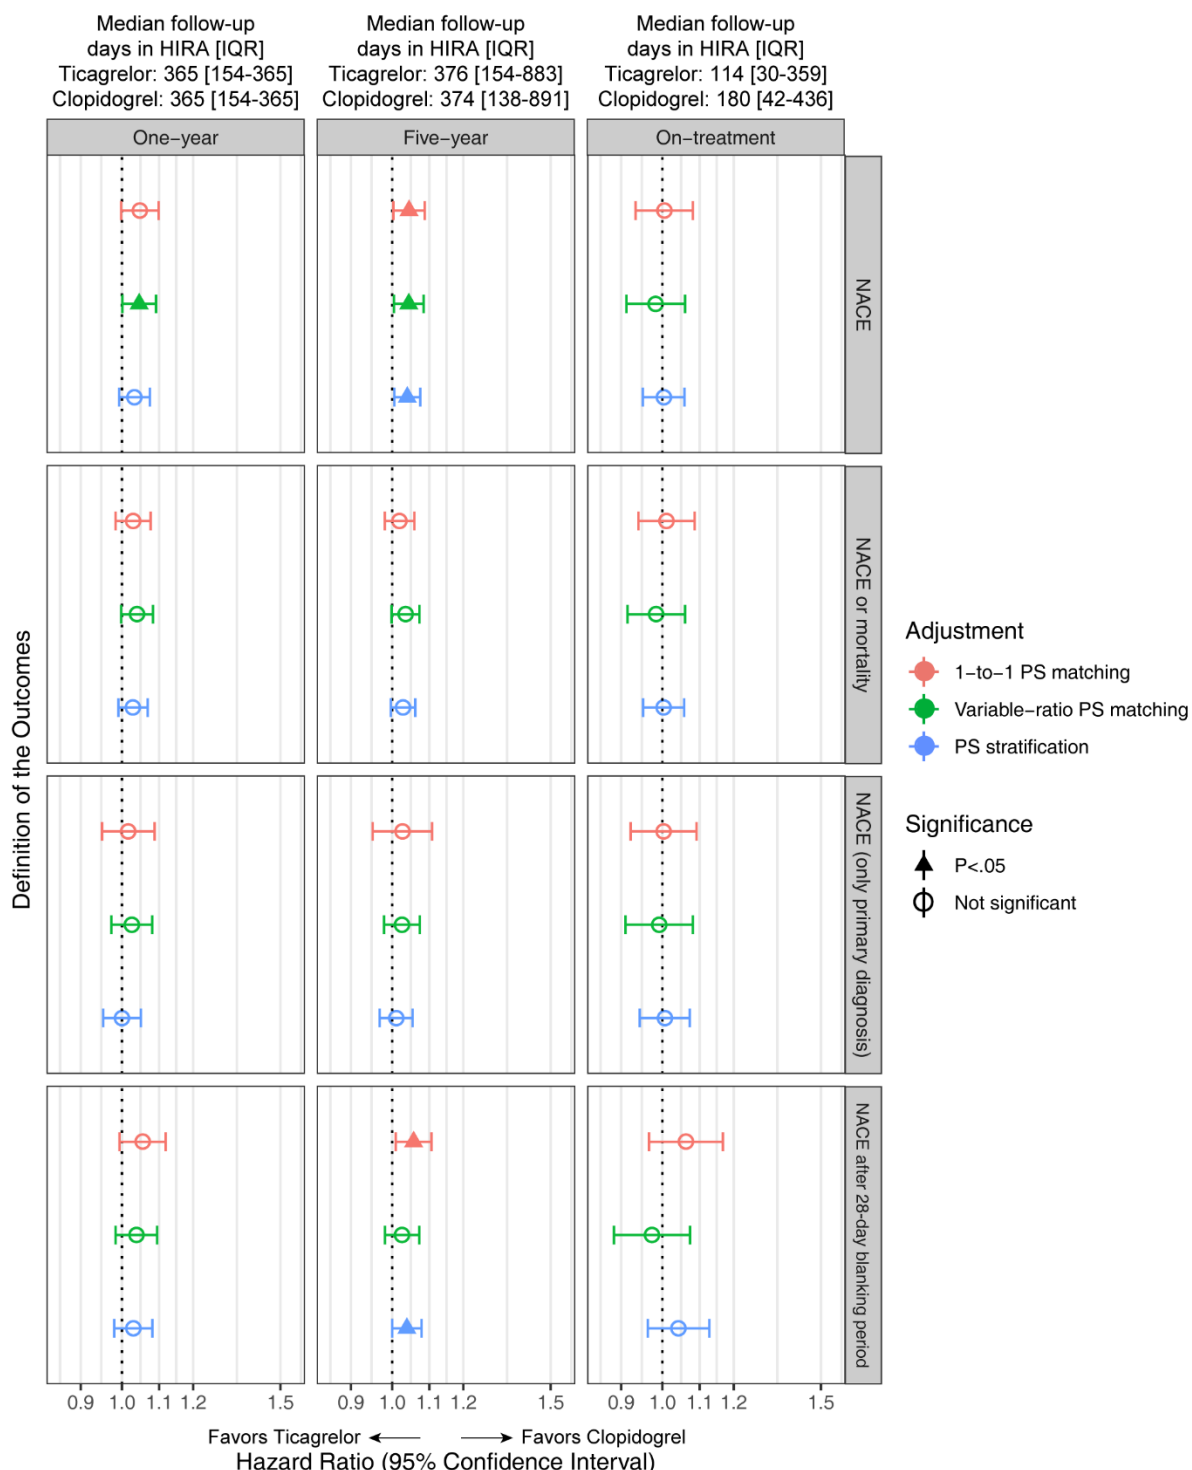

NACE includes ischemic events (recurrent acute myocardial infarction, revascularization, or ischemic stroke) and hemorrhagic events (hemorrhagic stroke or gastrointestinal bleeding). The points indicate HR estimates and the lines their 95% CIs, based on 36 analyses with three different times-at-risk, three different statistical models, and four different clinical definitions of NACE. The one-year risk window was defined as the time from 1 day after the index date to the 365 days after the index date or the end of patients' record. Five-year risk window starts from 1 day to 1825 days after index date, which is an extended risk window from the 1-year risk window. The on-treatment risk window was defined as the time from 1 day after the index date until the end of persistent exposure to the drug of interest, allowing a 7-

day gap or the end of patients' record. The median follow-up days and IQRs in the HIRA database for NACE in the ticagrelor and clopidogrel group are described on the top of the graph. An HR >1 implies a higher risk in the ticagrelor group. Open circles represent HRs with CIs that included 1, and triangles represent HRs that were statistically significant.

Abbreviations: NACE, net adverse clinical event; PS, propensity score; HR, hazard ratio; CI, confidence interval; IQR, interquartile range; HIRA, Health Insurance Review and Assessment Service.

**eFigure 5. Risks of NACE associated with ticagrelor and clopidogrel use, analyzed using a meta-analysis and various time-at-risk, statistical, and clinical definition settings after empirical calibration**

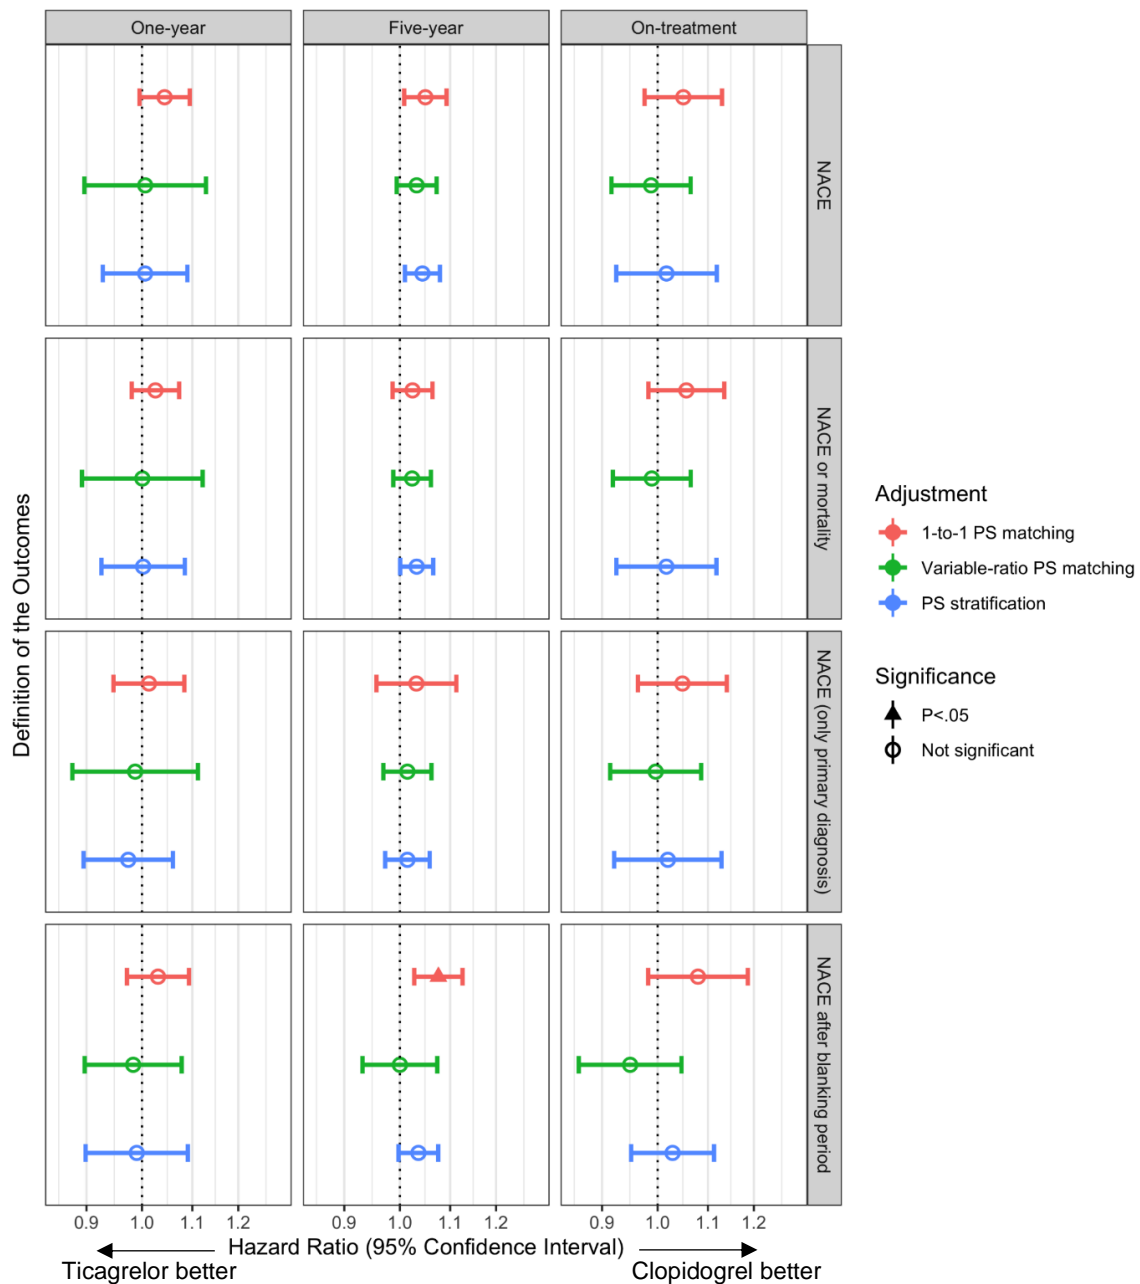

The points indicate HR estimates and the lines their 95% CIs, based on 36 analyses with three different times-at-risk, three different statistical models, and four different clinical definitions of NACE (recurrent acute myocardial infarction, revascularization, ischemic stroke, hemorrhagic stroke, or gastrointestinal bleeding) after empirical calibration. The one-year risk window was defined as the time from 1 day after the index date to the 365 days after the index date or the end of patients' record. Five-year risk window starts from 1 day to 1825 days after index date, which is extended risk window from the one-year risk window. The on-treatment risk window was defined as the time from 1 day after the index date until the end of persistent exposure to the drug of interest, allowing a 7-day gap or the end of patients' record. Blanking period means initial 28 days after the index date. An HR >1 implies a higher risk in the ticagrelor group. Open circles represent HRs with CIs that included 1, and triangles represent HRs that were statistically significant. Abbreviations: NACE, net adverse clinical event; PS, propensity score; HR, hazard ratio; CI, confidence interval.

**eFigure 6. Risks of NACE associated with ticagrelor and clopidogrel use, analyzed using a meta-analysis and various time-at-risk, statistical, and clinical definition settings from 2013 to 2015**

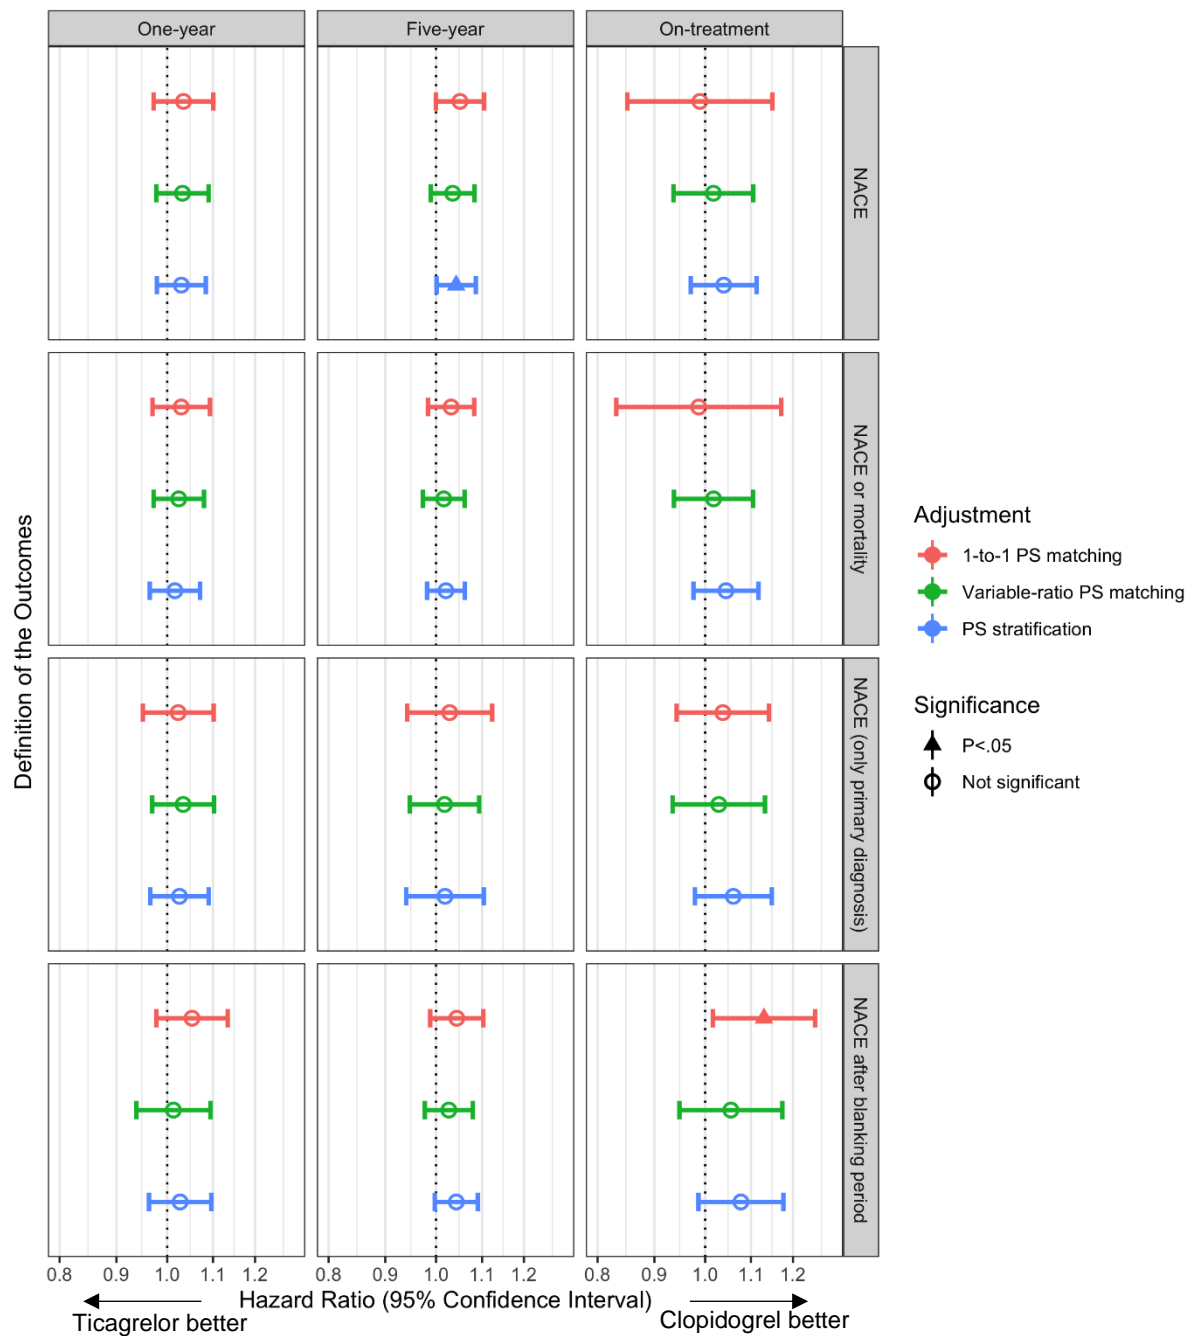

Points report HR estimates and line mark their 95% CIs from 36 analyses with 3 different time-at-risk, 3 different statistical model, and 4 different clinical definition of NACE (recurrent acute myocardial infarction, revascularization, ischemic stroke, hemorrhagic stroke, or gastrointestinal bleeding) from March 2013 to 2015. The one-year risk window was defined as the time from 1 day after the index date to the 365 days after the index date or the end of patients' record. Five-year risk window starts from 1 day to 1825 days after index date, which is extended risk window from the one-year risk window. The on-treatment risk window was defined as the time from 1 day after the index date until the end of persistent exposure to the drug of interest, allowing a 7-day gap or the end of patients' record. Blanking period means initial 28 days after the index date. The hazard ratio greater than 1 means increased risk in the ticagrelor group. Open round circle points demarcate HRs with CIs covering 1, and closed triangle points indicate HRs with statistical significance.

Abbreviation: NACE, net adverse clinical event; PS, propensity score; HR, hazard ratio; CI, confidence interval

**eFigure 7. Distribution of risk estimates for NACE from 144 analyses before and after empirical calibration**

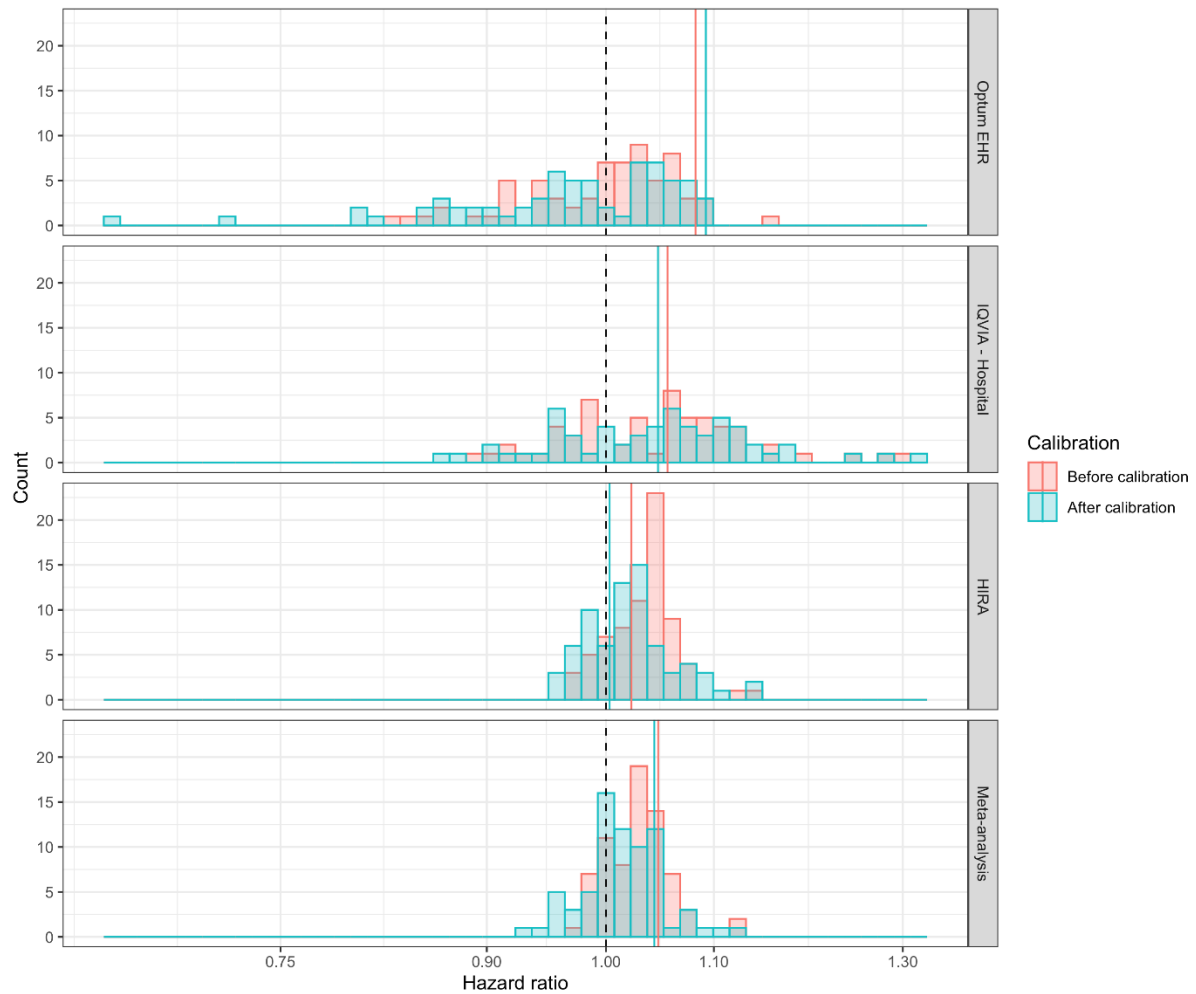

Histograms of point estimates (hazard ratios) for NACE (recurrent acute myocardial infarction, revascularization, ischemic stroke, hemorrhagic stroke, or gastrointestinal bleeding) from 72 different analyses before and after empirical calibration in three different databases and the meta-analysis. The vertical black dash line depicts hazard ratio of 1. Hazard ratios greater than 1 mean increased hazard risk of NACE in the ticagrelor group. The vertical solid pink and aquamarine line depict the hazard ratios from the primary analysis (one-year NACE risk after 1-to-1 propensity score matching) before and after empirical value calibration, respectively. The results from the 135 analyses among these 144 analyses (93.8%) were not statistically significant, and the results from the rest 9 analyses (6.3%) indicated increased risk of NACE in ticagrelor group in the meta-analysis (range of summary HR 1.04-1.13, all  $P < .05$ ). The complete set of results is available at an interactive website ([www.data.ohdsi.org/TicagrelorVsClopidogrel](http://www.data.ohdsi.org/TicagrelorVsClopidogrel)).

Abbreviation: NACE, net adverse clinical event; Optum EHR, Optum electronic health record; HIRA, health insurance review and assessment service



## eFigure 8. Meta-analysis results using only US databases

### A. NACE

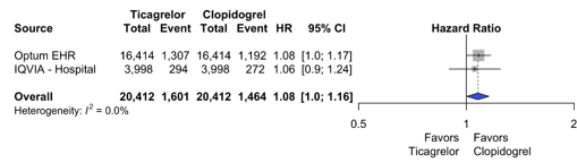

### F. Hemorrhagic event

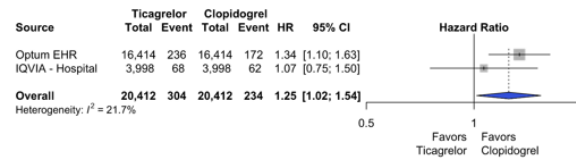

### B. Ischemic event

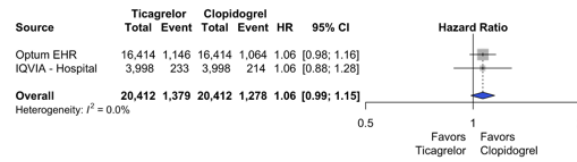

### G. Hemorrhagic stroke

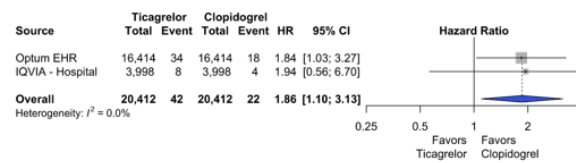

### C. Ischemic stroke

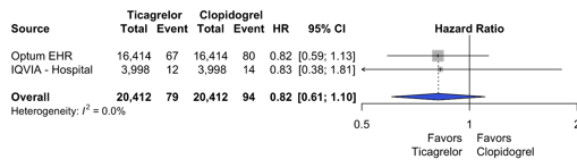

### H. GI bleeding

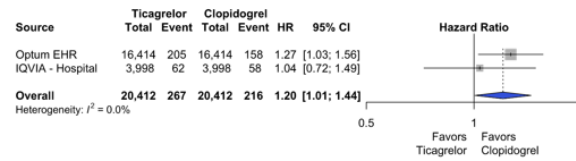

### D. Recurrent acute MI

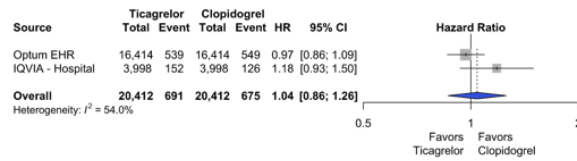

### I. All-cause mortality

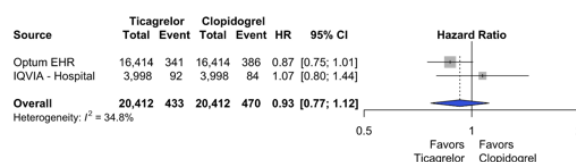

### E. Revascularization

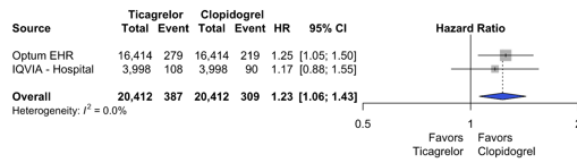

Forest plots depict HR and 95% CI for primary and secondary outcomes in two US data sources. The summary HR were calculated through random-effects model. The hazard ratio greater than 1 means increased risk in the ticagrelor group. The size of data marker indicates the weight of the study. Error bars indicate 95% CIs. (A) NACE (recurrent AMI, revascularization, ischemic stroke, hemorrhagic stroke, or GI bleeding), (B) Ischemic event (ischemic stroke, recurrent AMI, and revascularization), (C) ischemic stroke, (D) recurrent AMI, (E) revascularization, (F) hemorrhagic event (hemorrhagic stroke and GI bleeding), (G) hemorrhagic stroke, (H) GI bleeding, (I) all-cause mortality

Abbreviation: Optum EHR, Optum electronic health record; MI, myocardial infarction; GI, gastrointestinal; NACE, net adverse clinical event; HR, hazard ratio, CI, confidence interval.

**eFigure 9. Sensitivity analyses for risks of ischemic event (recurrent acute myocardial infarction, revascularization, or ischemic stroke) and hemorrhagic event (hemorrhagic stroke or gastrointestinal bleeding) associated with ticagrelor and clopidogrel use, analyzed using a meta-analysis and various time-at-risk, statistical, and clinical definition settings**

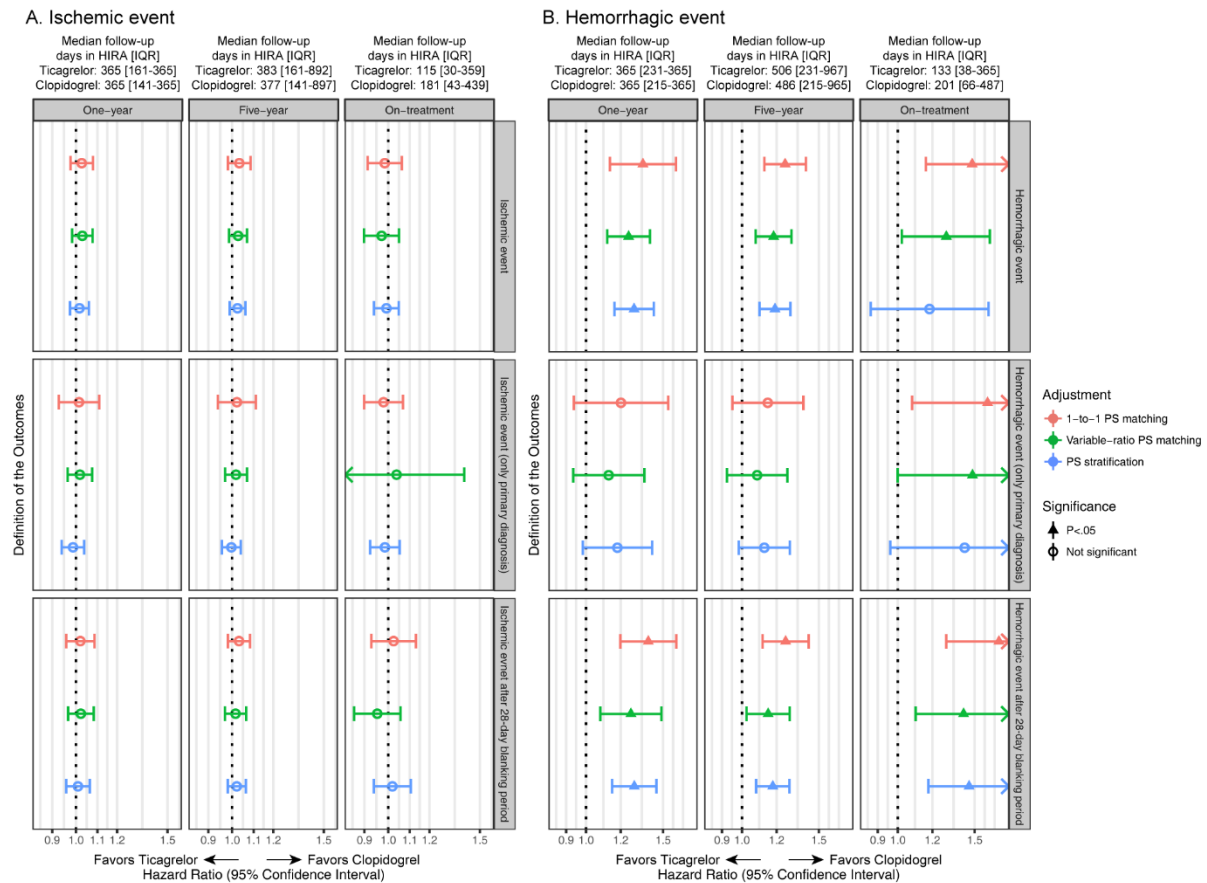

The points represent HR estimates and the lines their 95% CIs, based on 27 analyses with three different times-at-risk, three different statistical models, and three different clinical definitions of the secondary outcomes. The 1-year risk window was defined as the time from 1 day after the index date to the 365 days after the index date or the end of patients' record. Five-year risk window starts from 1 day to 1825 days after the index date, which is an extended risk window from the 1-year risk window. The on-treatment risk window was defined as the time from 1 day after the index date until the end of persistent exposure to the drug of interest, allowing a 7-day gap or the end of patients' record. The median follow-up days and IQRs in the HIRA database for ischemic event and hemorrhagic event in ticagrelor and clopidogrel group are described on the top of the graphs. An HR >1 implies a higher risk in the ticagrelor group. Open circles represent HRs with CIs that included 1, and closed triangles represent HRs that were statistically significant. (A) ischemic event and (B) hemorrhagic event.

Abbreviations: PS, propensity score; HR, hazard ratio; CI, confidence interval; IQR, interquartile range; HIRA, Health Insurance Review and Assessment Service.

**eFigure 10. Risks of ischemic stroke associated with ticagrelor and clopidogrel use, analyzed using a meta-analysis and various time-at-risk, statistical, and clinical definition settings**

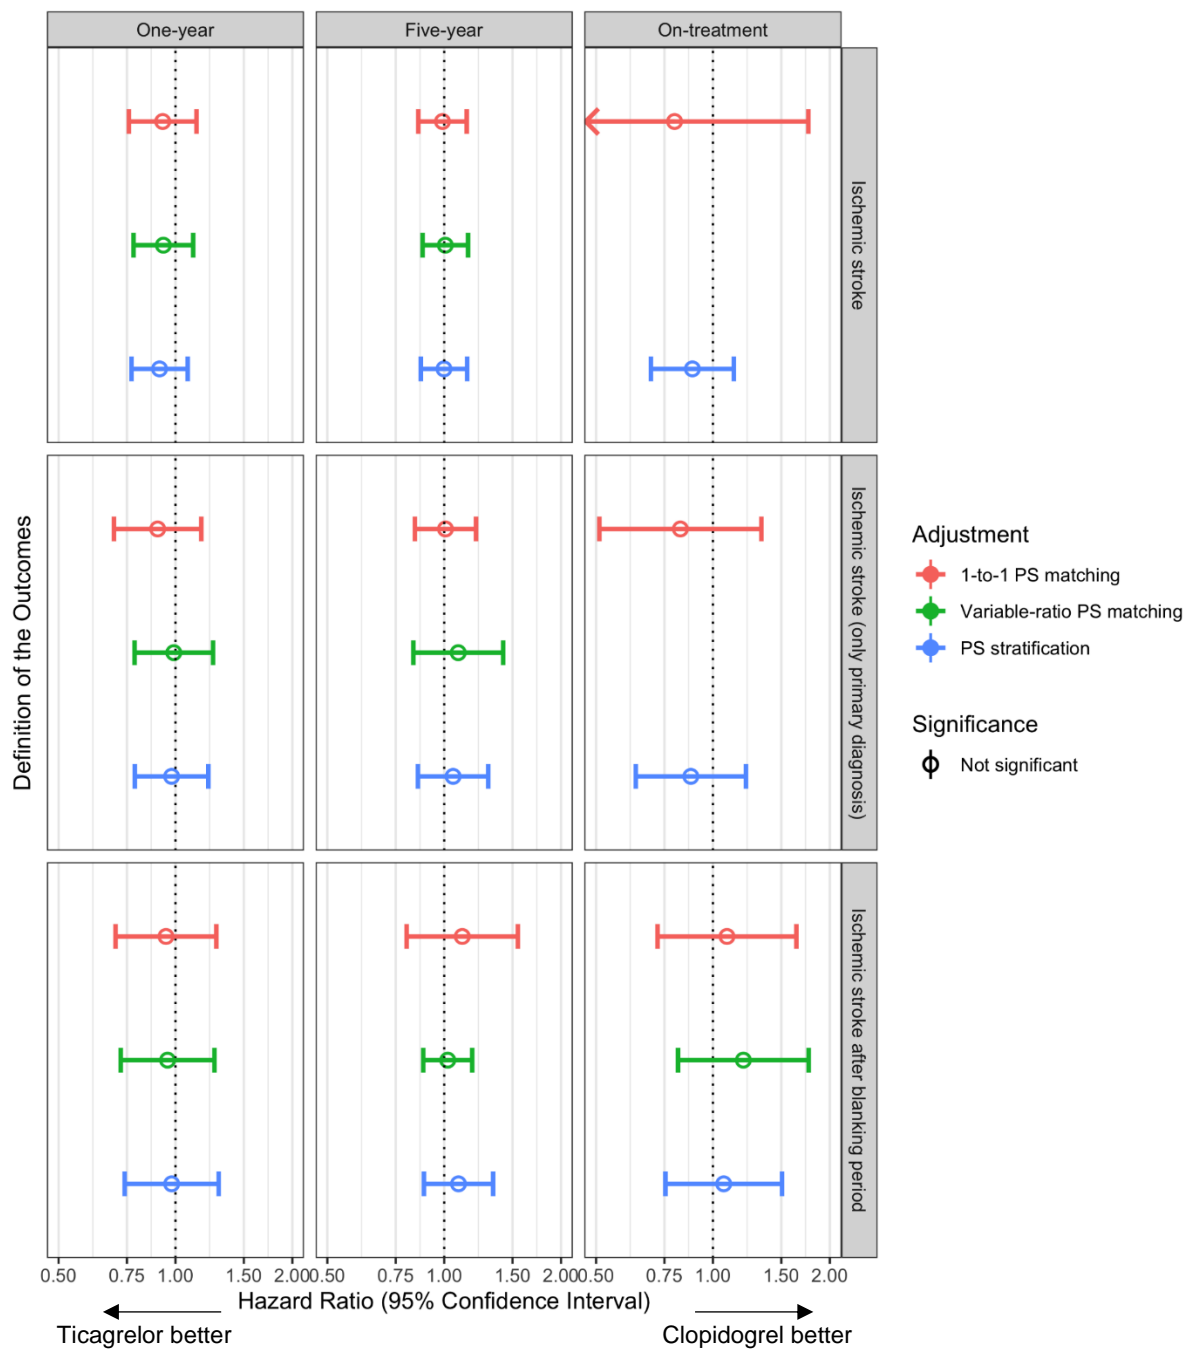

The points indicate HR estimates and the lines their 95% CIs, based on 25 analyses with three different times-at-risk, three different statistical models, and three different clinical definitions of ischemic stroke. The one-year risk window was defined as the time from 1 day after the index date to the 365 days after the index date or the end of patients' record. Five-year risk window starts from 1 day to 1825 days after index date, which is extended risk window from the one-year risk window. The on-treatment risk window was defined as the time from 1 day after the index date until the end of persistent exposure to the drug of interest, allowing a 7-day gap or the end of patients' record. Blanking period means initial 28 days after the index date. An HR >1 implies a higher risk in the ticagrelor group. Open circles represent HRs with CIs that included 1, and triangles represent HRs that were statistically significant. The results of meta-analysis were omitted to show when the result from Optum EHR was not available.

Abbreviation: PS, propensity score; HR, hazard ratio; CI, confidence interval; EHR, electronic health record

**eFigure 11. Risks of recurrent acute myocardial infarction associated with ticagrelor and clopidogrel use, analyzed using a meta-analysis and various time-at-risk, statistical, and clinical definition settings**

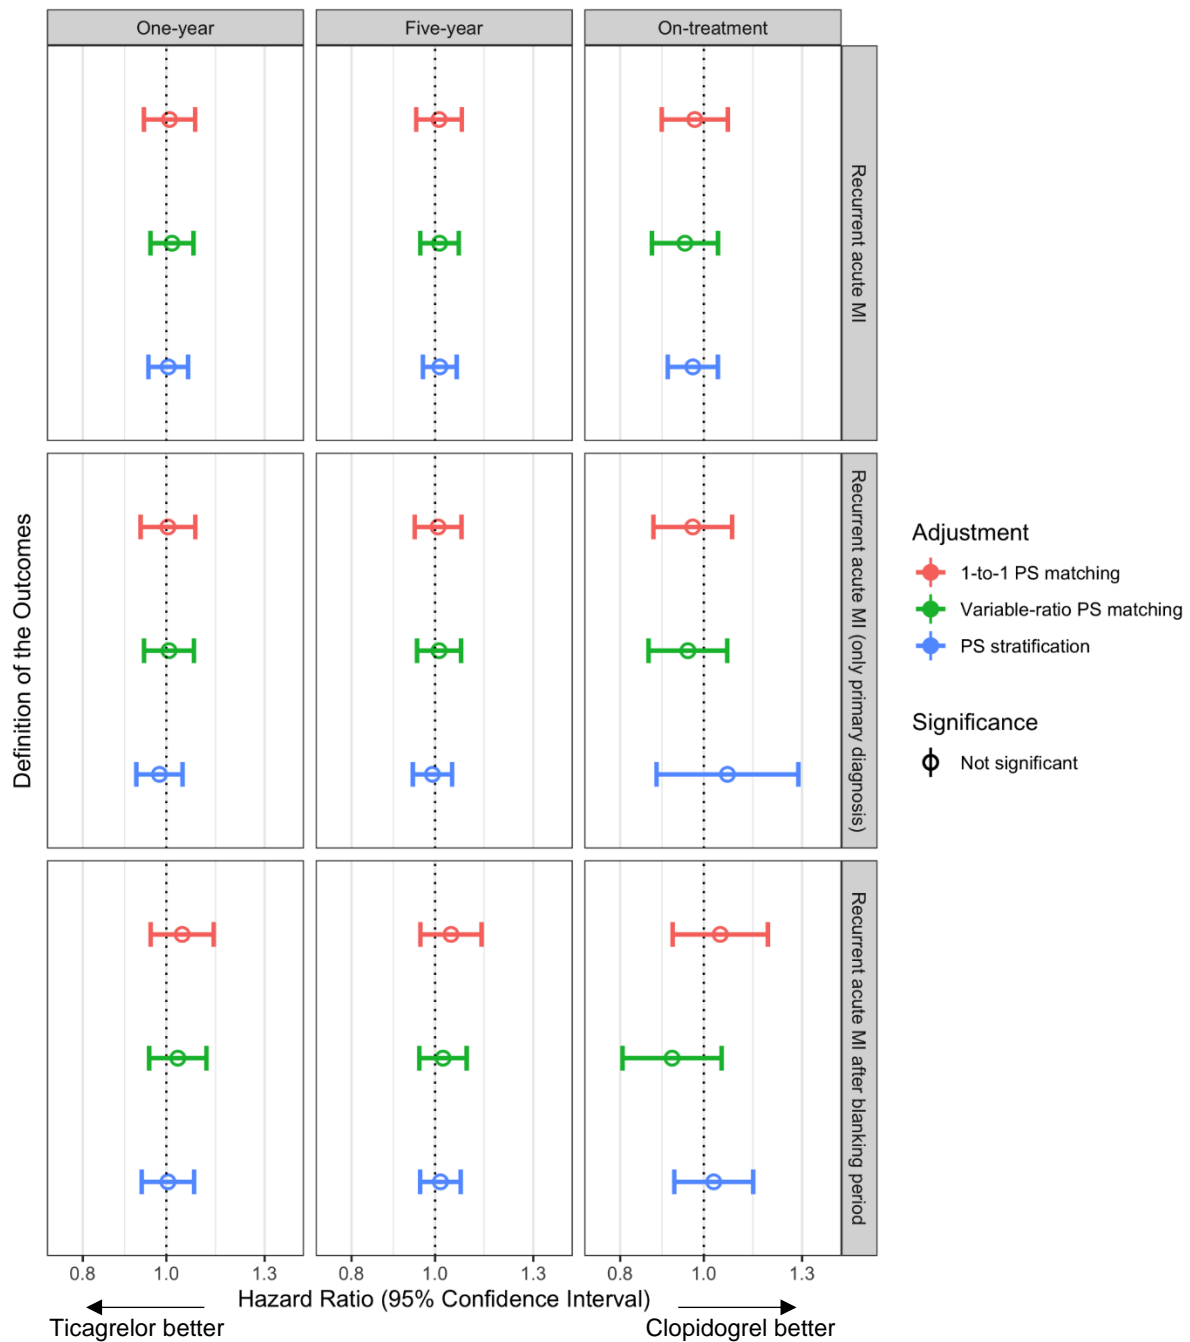

The points indicate HR estimates and the lines their 95% CIs, based on 27 analyses with three different times-at-risk, three different statistical models, and three different clinical definitions of acute MI. The one-year risk window was defined as the time from 1 day after the index date to the 365 days after the index date or the end of patients' record. Five-year risk window starts from 1 day to 1825 days after index date, which is extended risk window from the one-year risk window. The on-treatment risk window was defined as the time from 1 day after the index date until the end of persistent exposure to the drug of interest, allowing a 7-day gap or the end of patients' record. Blanking period means initial 28 days after the index date. An HR >1 implies a higher risk in the ticagrelor group. Open circles represent HRs with CIs that included 1, and triangles represent HRs that were statistically significant.

Abbreviation: MI, myocardial infarction; PS, propensity score; HR, hazard ratio; CI, confidence interval

**eFigure 12. Risks of revascularization associated with ticagrelor and clopidogrel use, analyzed using a meta-analysis and various time-at-risk, statistical, and clinical definition settings**

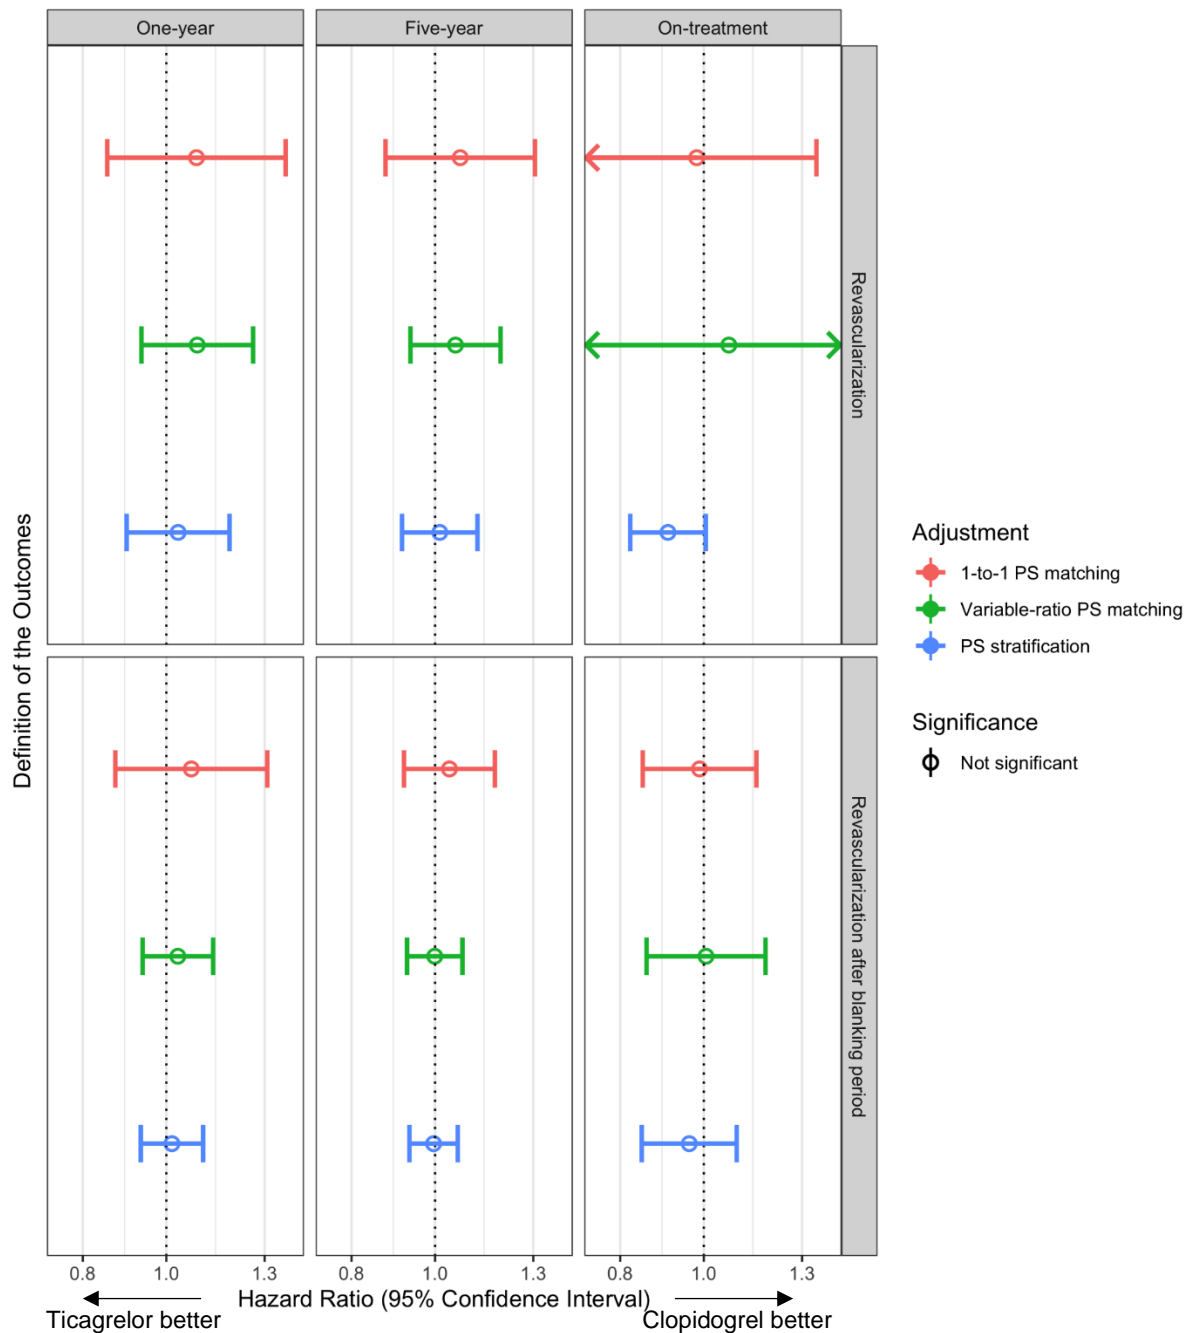

The points indicate HR estimates and the lines their 95% CIs, based on 18 analyses with three different times-at-risk, three different statistical models, and two different clinical definitions of revascularization. The one-year risk window was defined as the time from 1 day after the index date to the 365 days after the index date or the end of patients' record. Five-year risk window starts from 1 day to 1825 days after index date, which is extended risk window from the one-year risk window. The on-treatment risk window was defined as the time from 1 day after the index date until the end of persistent exposure to the drug of interest, allowing a 7-day gap or the end of patients' record. Blanking period means initial 28 days after the index date. An HR >1 implies a higher risk in the ticagrelor group. Open circles represent HRs with CIs that included 1, and triangles represent HRs that were statistically significant.

Abbreviation: PS, propensity score; HR, hazard ratio; CI, confidence interval

**eFigure 13. Risks of hemorrhagic stroke associated with ticagrelor and clopidogrel use, analyzed using a meta-analysis and various time-at-risk, statistical, and clinical definition settings**

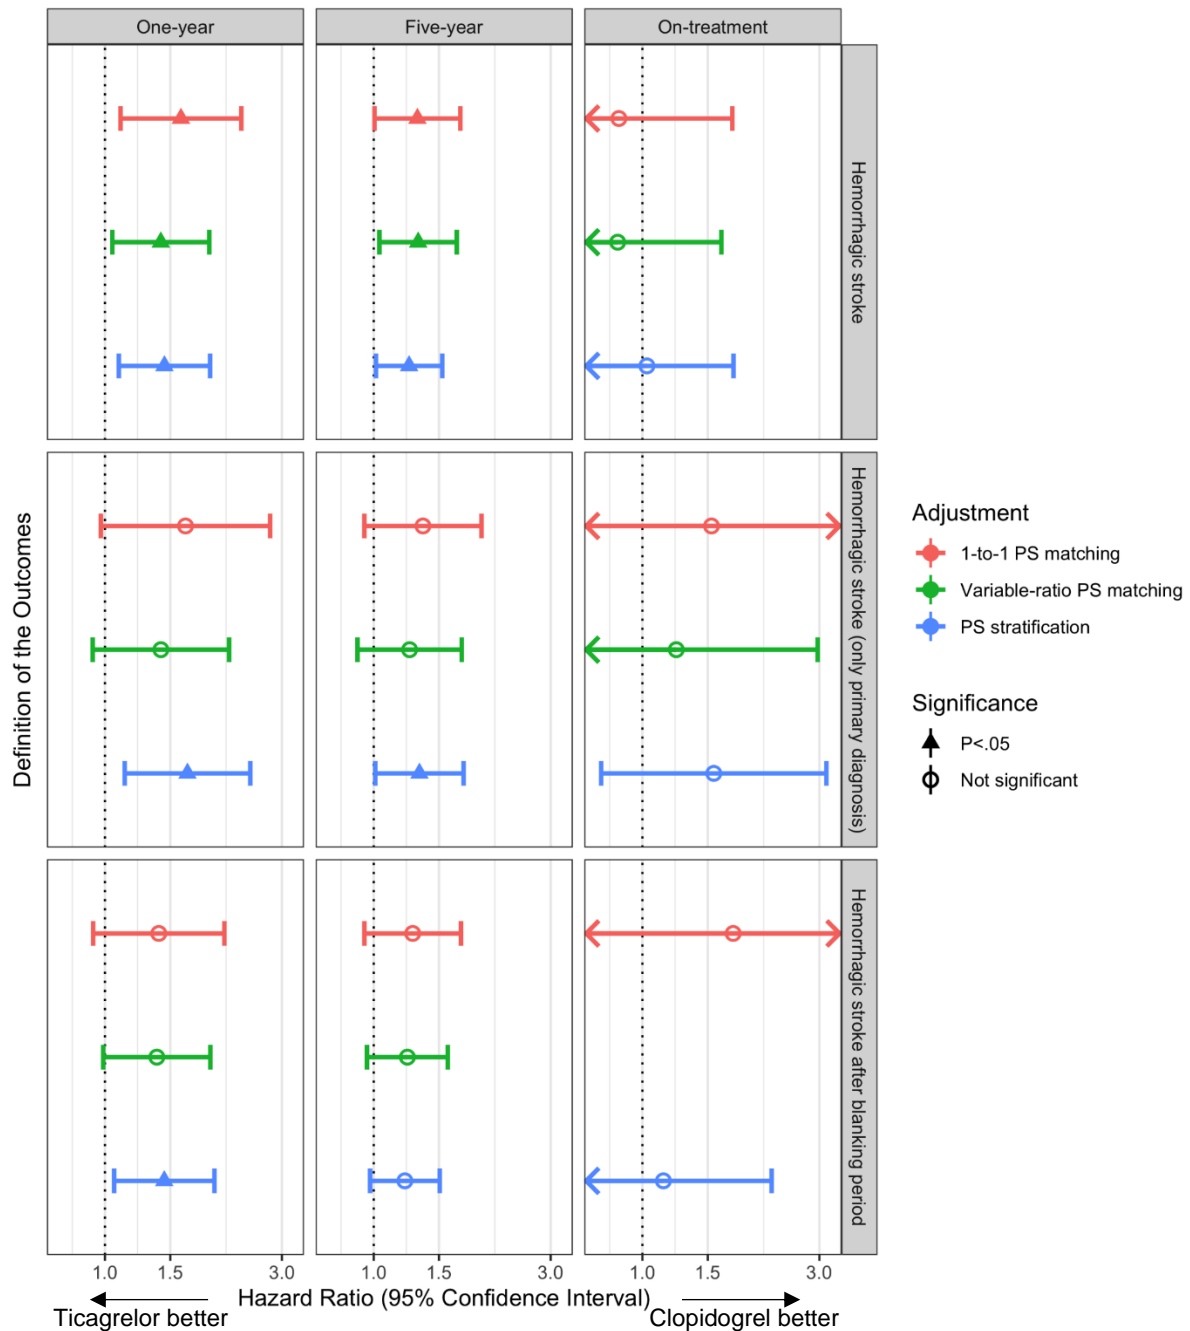

The points indicate HR estimates and the lines their 95% CIs, based on 26 analyses with three different times-at-risk, three different statistical models, and three different clinical definitions of hemorrhagic stroke. The one-year risk window was defined as the time from 1 day after the index date to the 365 days after the index date or the end of patients' record. Five-year risk window starts from 1 day to 1825 days after index date, which is extended risk window from the one-year risk window. The on-treatment risk window was defined as the time from 1 day after the index date until the end of persistent exposure to the drug of interest, allowing a 7-day gap or the end of patients' record. Blanking period means initial 28 days after the index date. An HR >1 implies a higher risk in the ticagrelor group. Open circles represent HRs with CIs that included 1, and triangles represent HRs that were statistically significant. The results of meta-analysis were omitted to show when the result from Optum EHR was not available.

Abbreviation: PS, propensity score; HR, hazard ratio; CI, confidence interval; EHR, electronic health record

**eFigure 14. Risks of GI bleeding associated with ticagrelor and clopidogrel use, analyzed using a meta-analysis and various time-at-risk, statistical, and clinical definition settings**

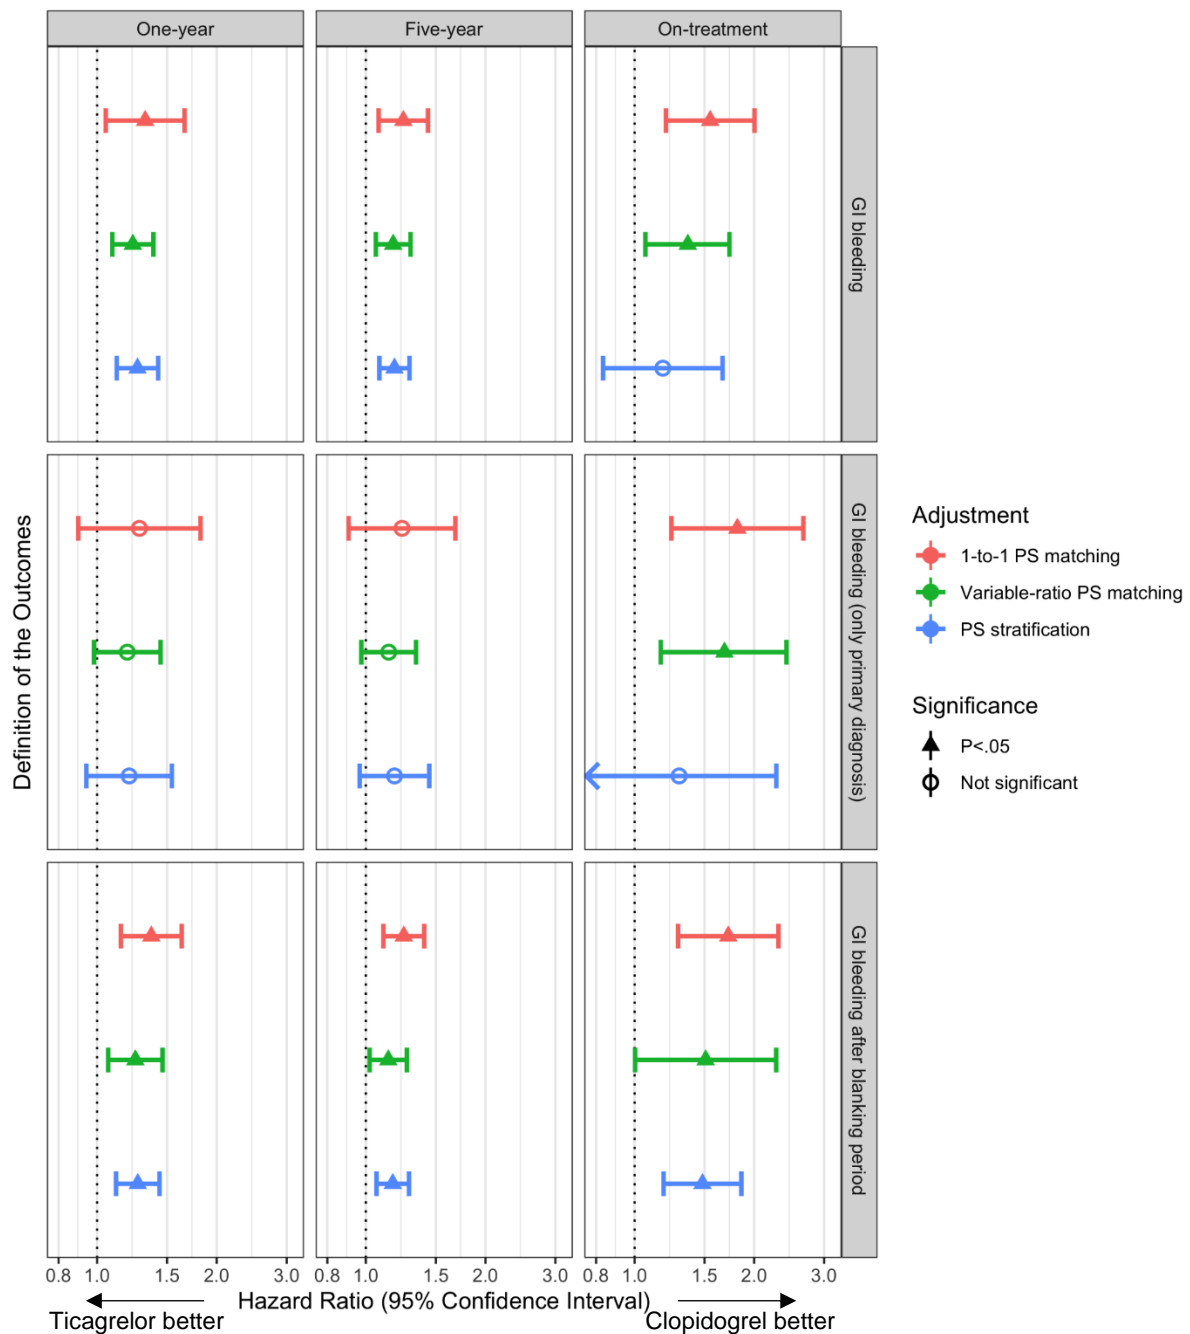

The points indicate HR estimates and the lines their 95% CIs, based on 27 analyses with three different times-at-risk, three different statistical models, and three different clinical definitions of GI bleeding. The one-year risk window was defined as the time from 1 day after the index date to the 365 days after the index date or the end of patients' record. Five-year risk window starts from 1 day to 1825 days after index date, which is extended risk window from the one-year risk window. The on-treatment risk window was defined as the time from 1 day after the index date until the end of persistent exposure to the drug of interest, allowing a 7-day gap or the end of patients' record. Blanking period means initial 28 days after the index date. An HR >1 implies a higher risk in the ticagrelor group. Open circles represent HRs with CIs that included 1, and triangles represent HRs that were statistically significant.

Abbreviation: GI, gastrointestinal, PS, propensity score; HR, hazard ratio; CI, confidence interval



**eFigure 15. Risks of all-cause mortality associated with ticagrelor and clopidogrel use, analyzed using a meta-analysis and various time-at-risk, statistical, and clinical definition settings**

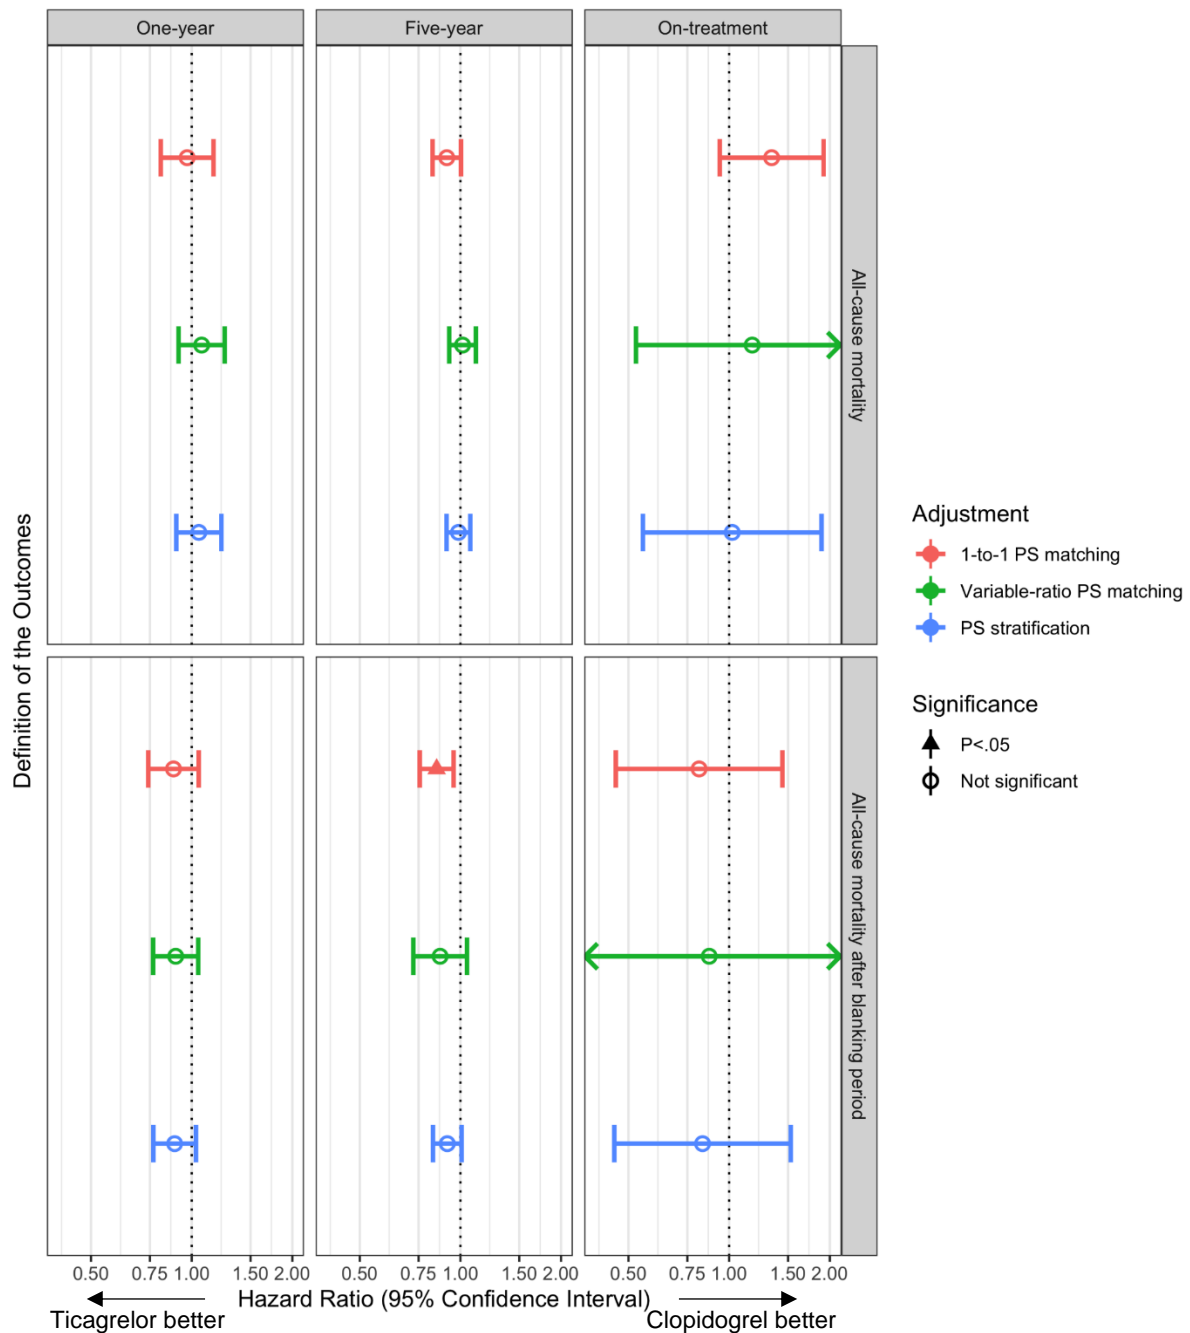

The points indicate HR estimates and the lines their 95% CIs, based on 18 analyses with three different times-at-risk, three different statistical models, and two different clinical definitions of overall mortality. The one-year risk window was defined as the time from 1 day after the index date to the 365 days after the index date or the end of patients' record. Five-year risk window starts from 1 day to 1825 days after index date, which is extended risk window from the one-year risk window. The on-treatment risk window was defined as the time from 1 day after the index date until the end of persistent exposure to the drug of interest, allowing a 7-day gap or the end of patients' record. Blanking period means initial 28 days after the index date. An HR >1 implies a higher risk in the ticagrelor group. Open circles represent HRs with CIs that included 1, and triangles represent HRs that were statistically significant.

Abbreviation: PS, propensity score; HR, hazard ratio; CI, confidence interval

**eFigure 16. Risks of cardiovascular-related mortality associated with ticagrelor and clopidogrel use, analyzed using a meta-analysis and various time-at-risk, statistical, and clinical definition settings**

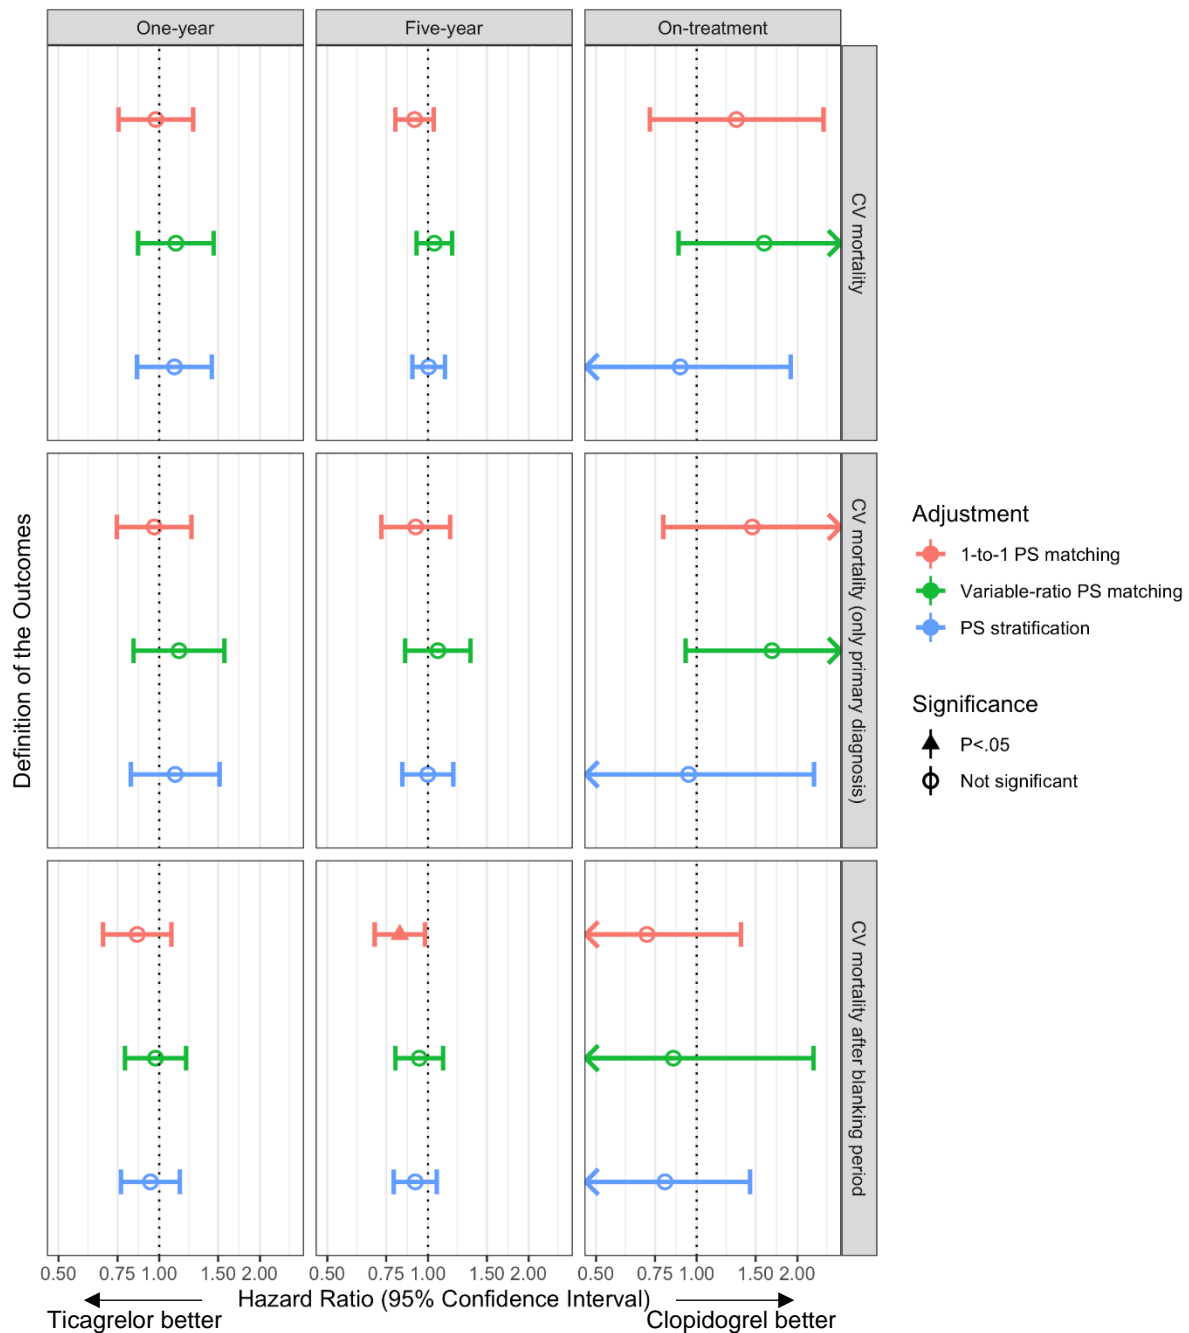

The points indicate HR estimates and the lines their 95% CIs, based on 18 analyses with three different times-at-risk, three different statistical models, and two different clinical definitions of cardiovascular-related mortality. The one-year risk window was defined as the time from 1 day after the index date to the 365 days after the index date or the end of patients' record. Five-year risk window starts from 1 day to 1825 days after index date, which is extended risk window from the one-year risk window. The on-treatment risk window was defined as the time from 1 day after the index date until the end of persistent exposure to the drug of interest, allowing a 7-day gap or the end of patients' record. Blanking period means initial 28 days after the index date. An HR >1 implies a higher risk in the ticagrelor group. Open circles represent HRs with CIs that included 1, and triangles represent HRs that were statistically significant.

Abbreviation: CV, cardiovascular-related; PS, propensity score; HR, hazard ratio; CI, confidence interval

**eFigure 17. Risks of major adverse cardiovascular event associated with ticagrelor and clopidogrel use, analyzed using a meta-analysis and various time-at-risk, statistical, and clinical definition settings**

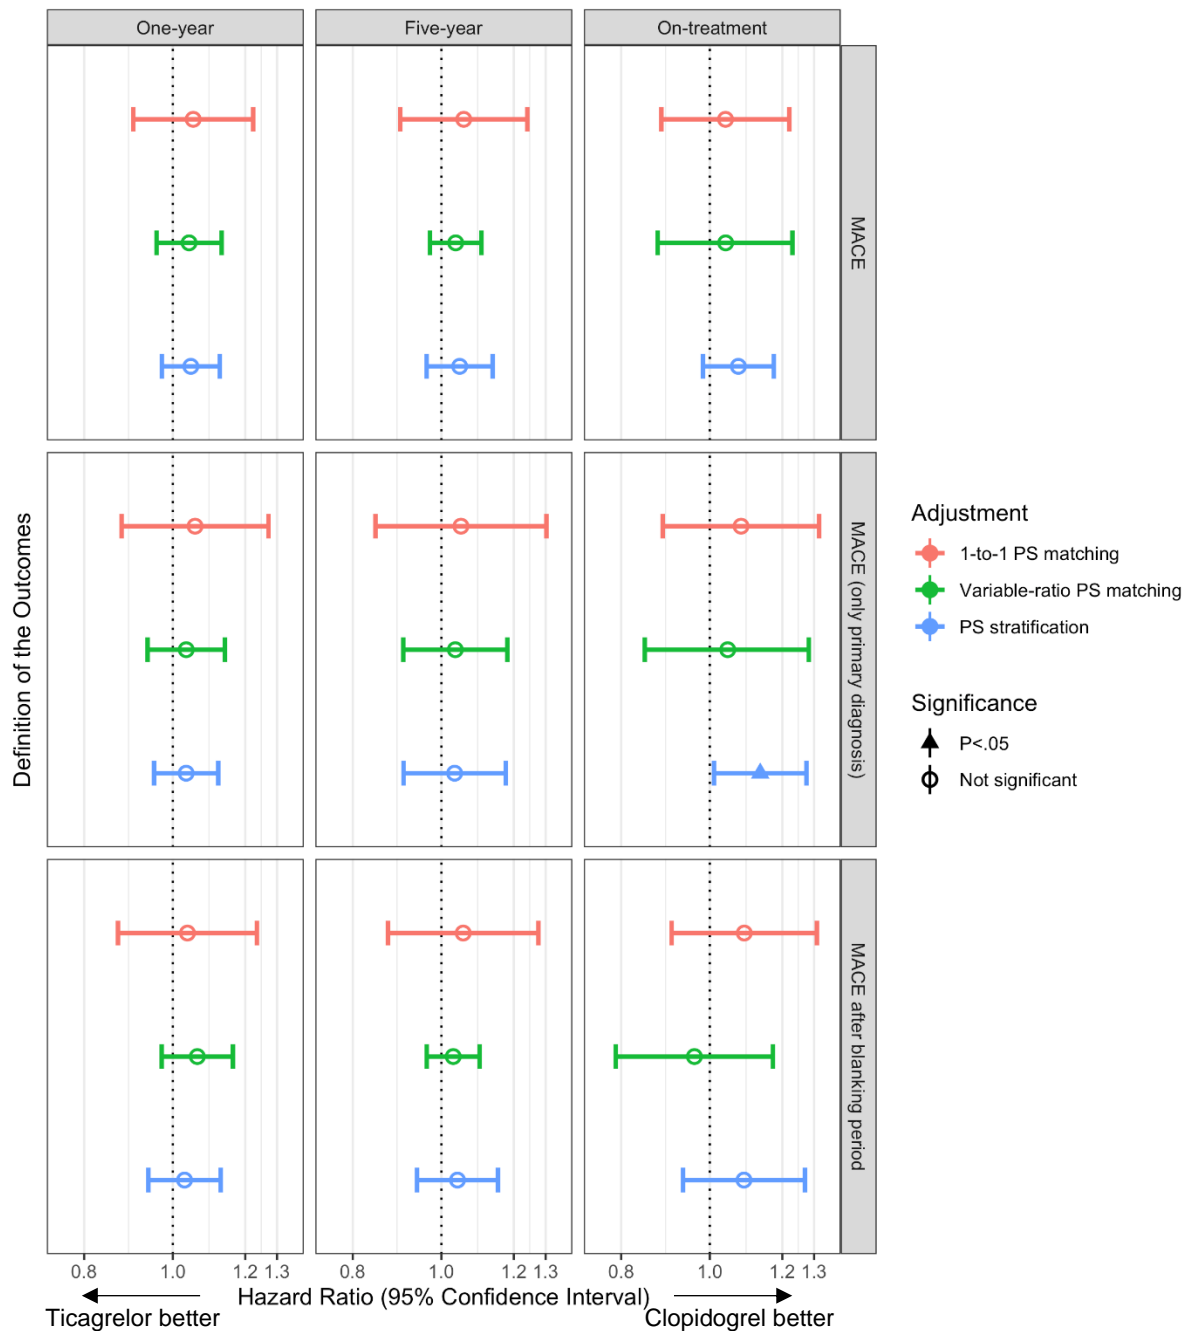

The points indicate HR estimates and the lines their 95% CIs, based on 27 analyses with three different times-at-risk, three different statistical models, and two different clinical definitions of major adverse cardiovascular event (cardiovascular-related mortality, recurrent acute myocardial infarction, and stroke) overall mortality. The one-year risk window was defined as the time from 1 day after the index date to the 365 days after the index date or the end of patients' record. Five-year risk window starts from 1 day to 1825 days after index date, which is extended risk window from the one-year risk window. The on-treatment risk window was defined as the time from 1 day after the index date until the end of persistent exposure to the drug of interest, allowing a 7-day gap or the end of patients' record. Blanking period means initial 28 days after the index date. An HR >1 implies a higher risk in the ticagrelor group. Open circles represent HRs with CIs that included 1, and triangles represent HRs that were statistically significant.

Abbreviation: MACE, major adverse cardiovascular event; PS, propensity score; HR, hazard ratio; CI, confidence interval

## Reference

1. You SC, Lee S, Cho S, et al. Conversion of National Health Insurance Service-National Sample Cohort (NHIS-NSC) Database into Observational Medical Outcomes Partnership-Common Data Model (OMOP-CDM). *Stud Health Technol Inform.* 2017;245:467-470
2. Voss EA, Boyce RD, Ryan PB, van der Lei J, Rijnbeek PR, Schuemie MJ. Accuracy of an automated knowledge base for identifying drug adverse reactions. *J Biomed Inform.* 2017;66:72-81.
3. Eikelboom JW, Connolly SJ, Hart RG, et al. Balancing the Benefits and Risks of 2 Doses of Dabigatran Compared With Warfarin in Atrial Fibrillation. *J Am Coll Cardiol.* 2013;62(10):900-908.
4. Lee J, Lee JS, Park S-H, Shin SA, Kim K. Cohort Profile: The National Health Insurance Service–National Sample Cohort (NHIS-NSC), South Korea. *Int J Epidemiol.* 2017;46(2):e15.
5. Park DW, Kwon O, Jang JS, et al. Clinically significant bleeding with ticagrelor versus clopidogrel in Korean patients with acute coronary syndromes intended for invasive management: a randomized clinical trial. *Circulation.* 2019;140(23):1865-1877.
